# Supplementary material for: Solution-phase synthesis of chiral O-acyl isodipeptides
Source: Royal Society of Chemistry journal article supplement (doi:10.1039/c1md00130b), 2011-01-01

## SUPPORTING INFORMATION

### Solution-Phase Synthesis of Chiral *O*-Acyl Isodipeptides

Mirna El Khatib, Lilibeth Jauregui, Srinivasa R. Tala, Levan Khelashvili, Alan R. Katritzky<sup>a</sup>

*Center for Heterocyclic Compounds, Department of Chemistry,*

*University of Florida, Gainesville, FL 32611-7200, USA*

#### Table of Contents

|                                                                                 |     |
|---------------------------------------------------------------------------------|-----|
| 1. <sup>1</sup> H NMR and <sup>13</sup> C NMR spectra for compounds <b>2a-g</b> | S2  |
| 2. <sup>1</sup> H NMR and <sup>13</sup> C NMR spectra for compounds <b>3a-h</b> | S19 |
| 3. <sup>1</sup> H NMR and <sup>13</sup> C NMR spectra for compounds <b>4a-h</b> | S37 |

# 1. $^1\text{H}$ NMR and $^{13}\text{C}$ NMR spectra for compounds **2a-g**

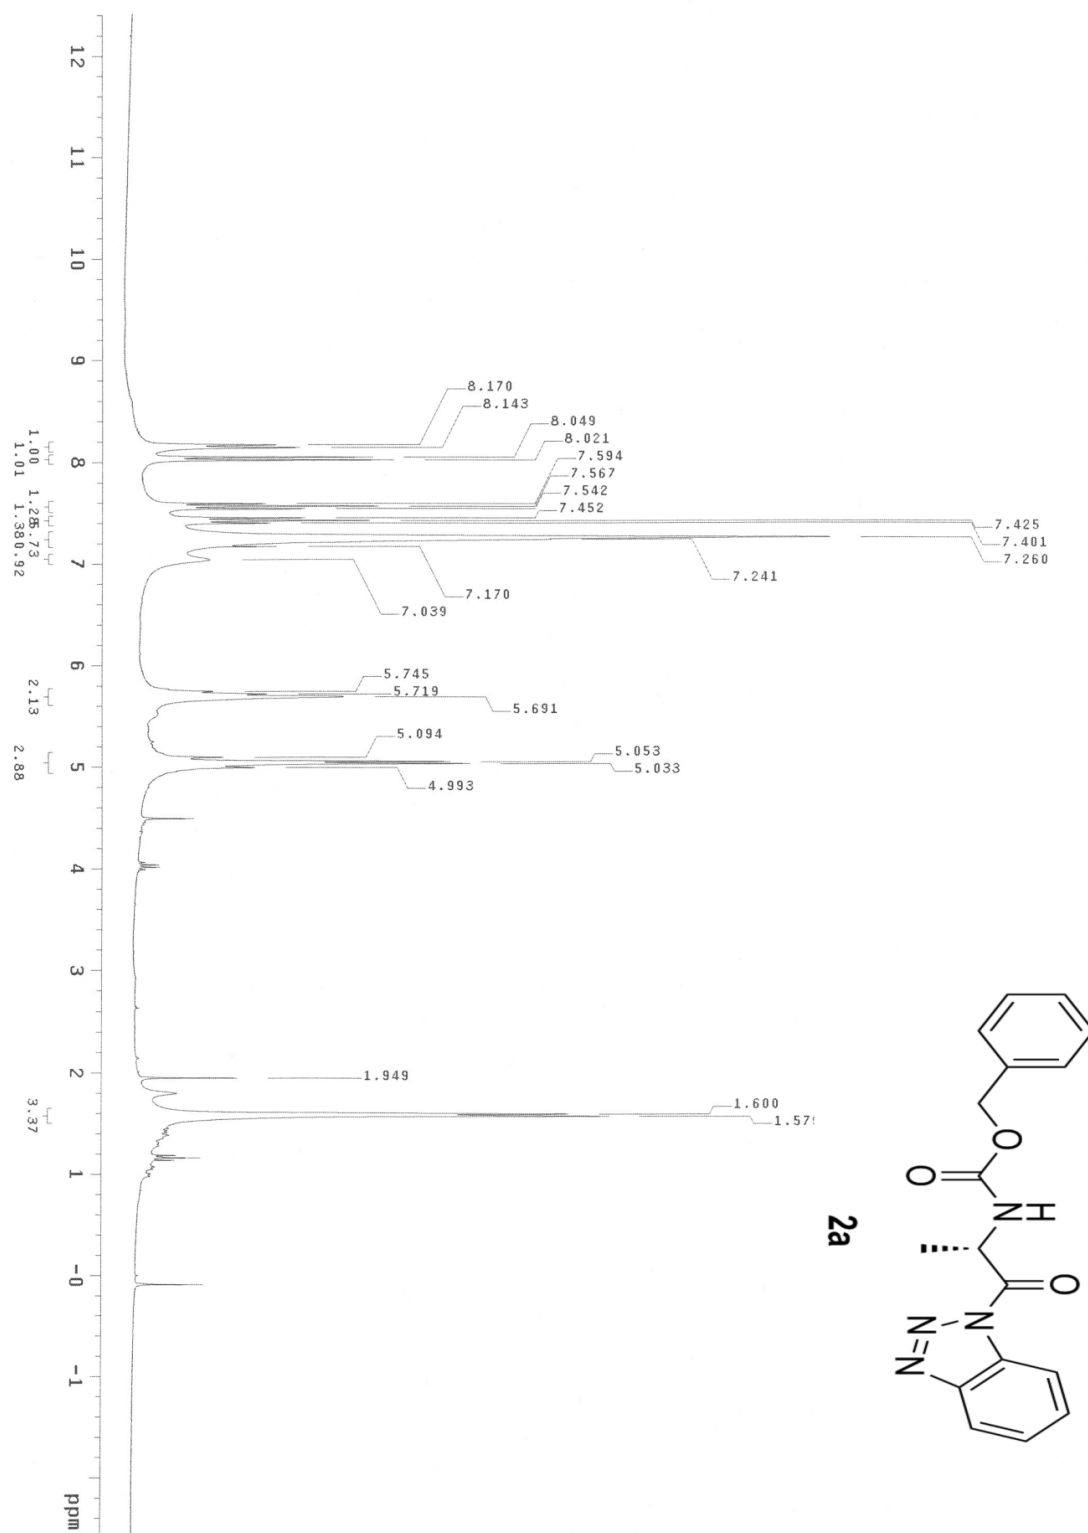

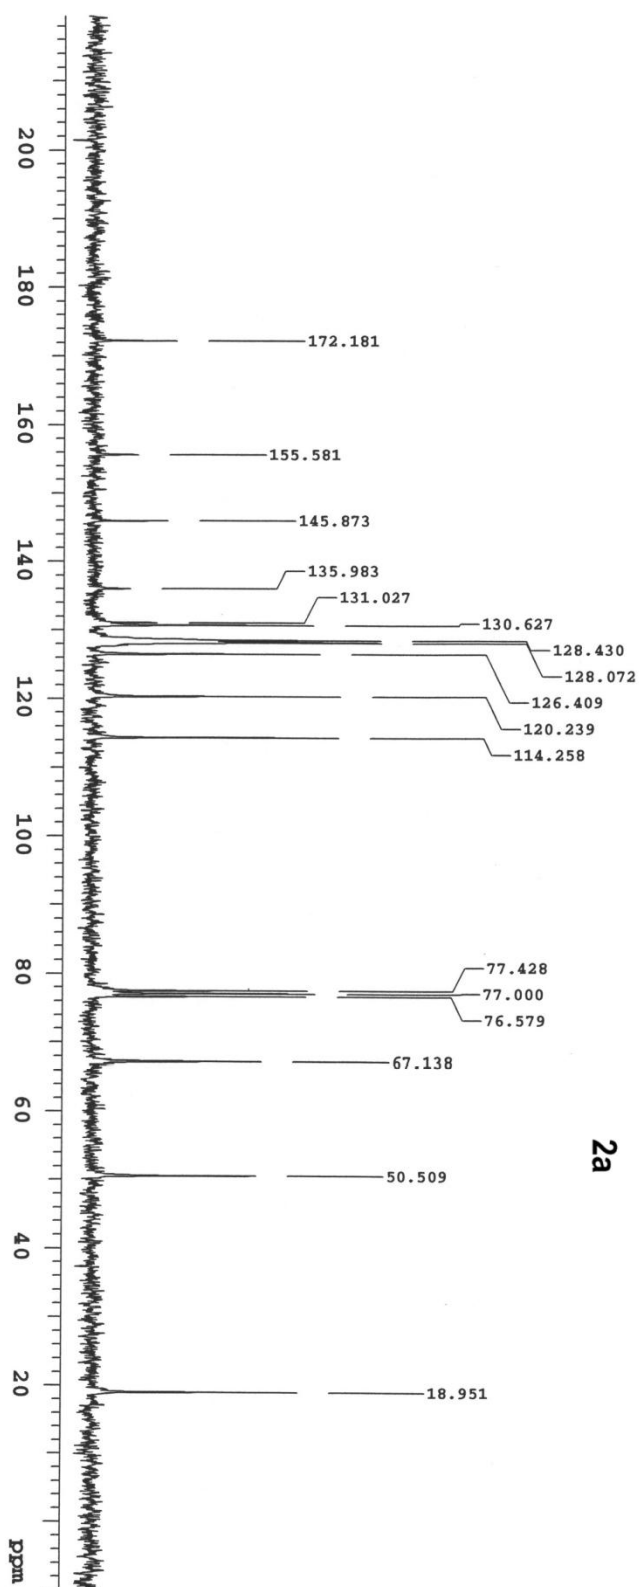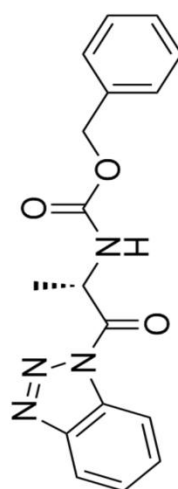

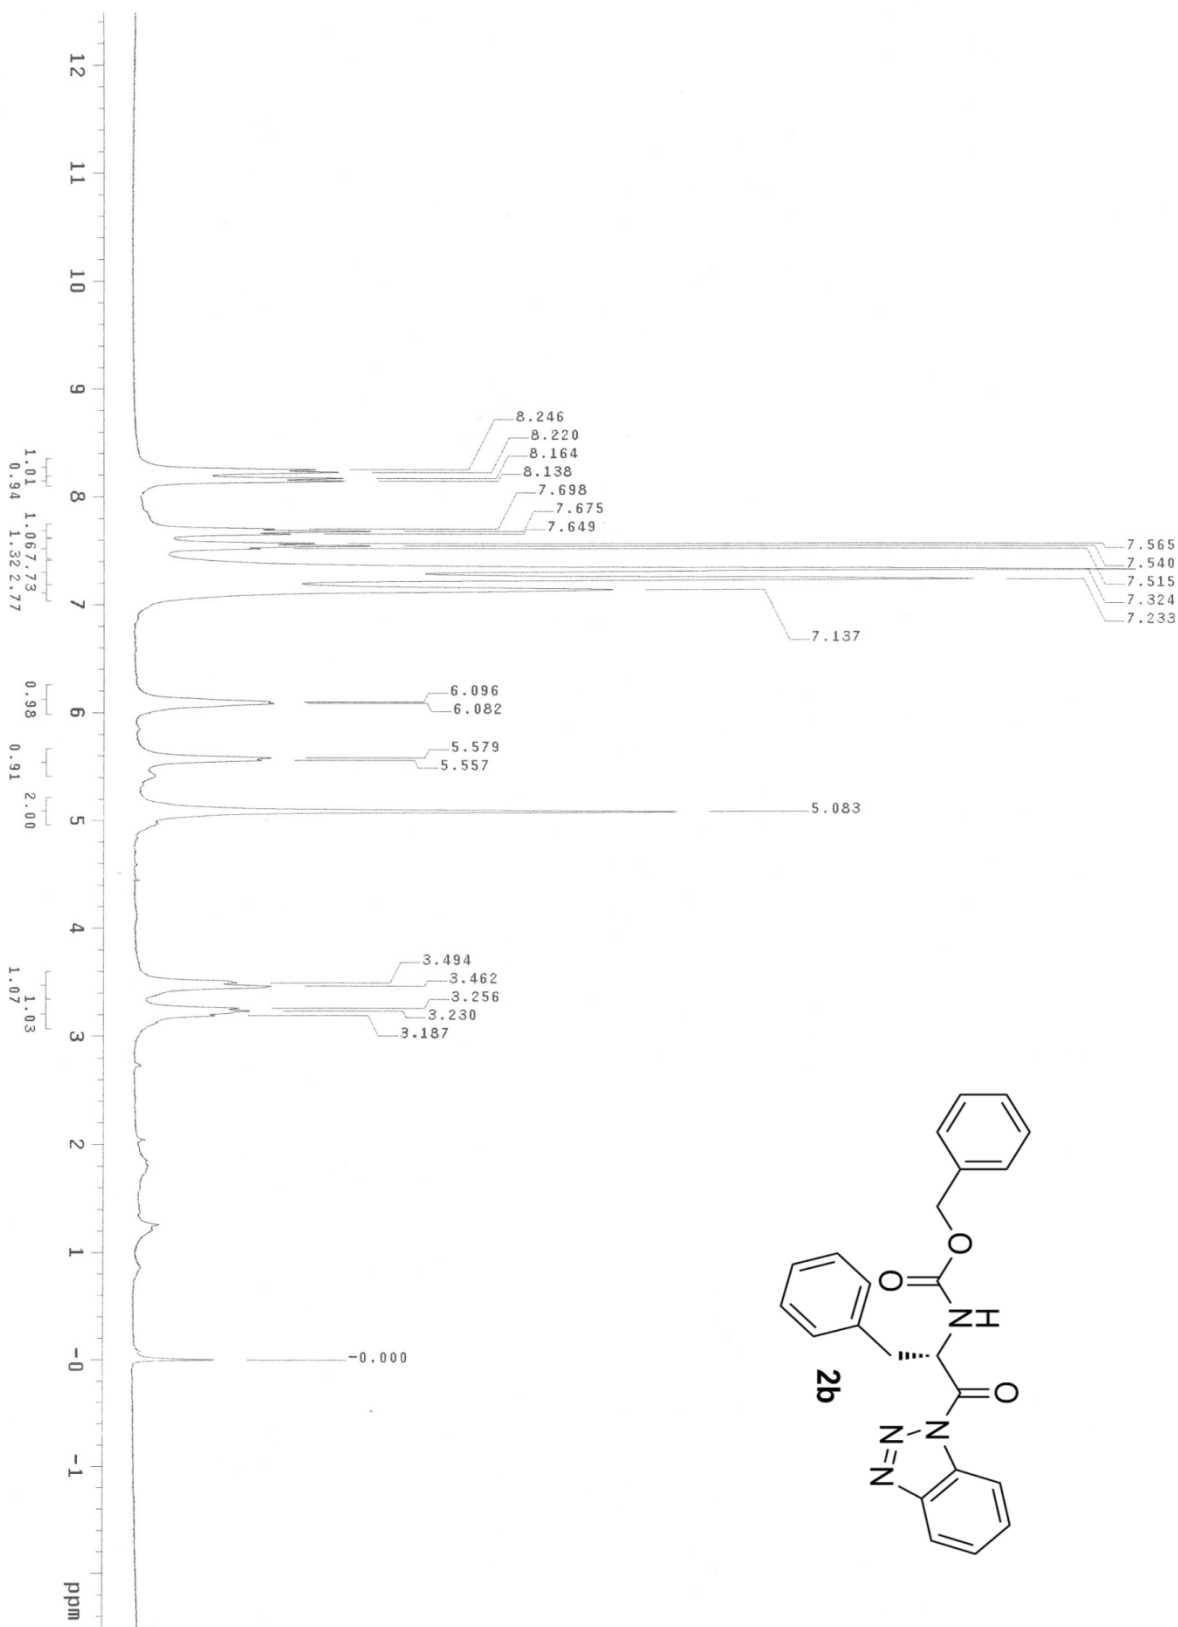

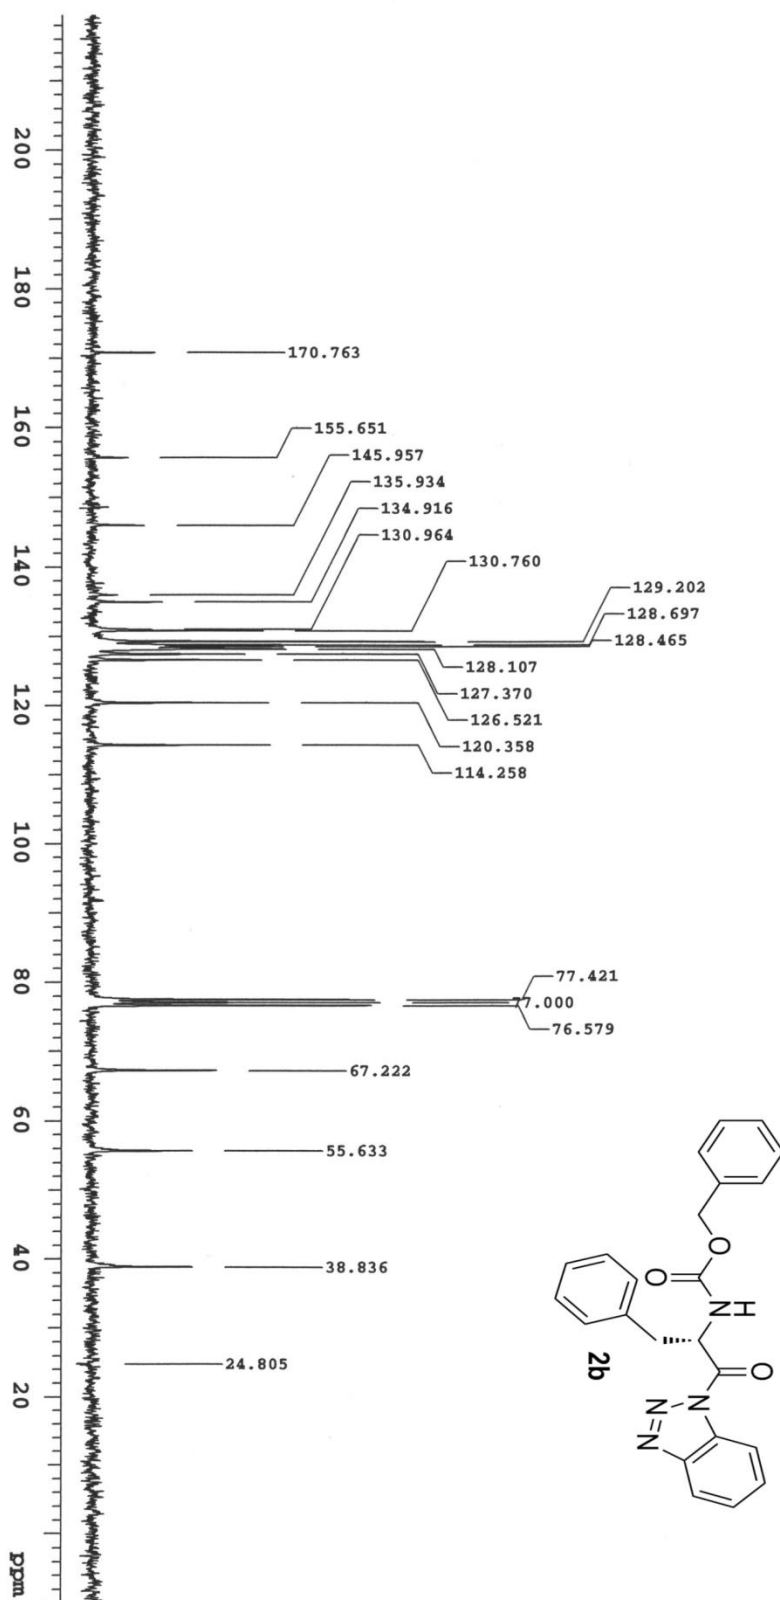

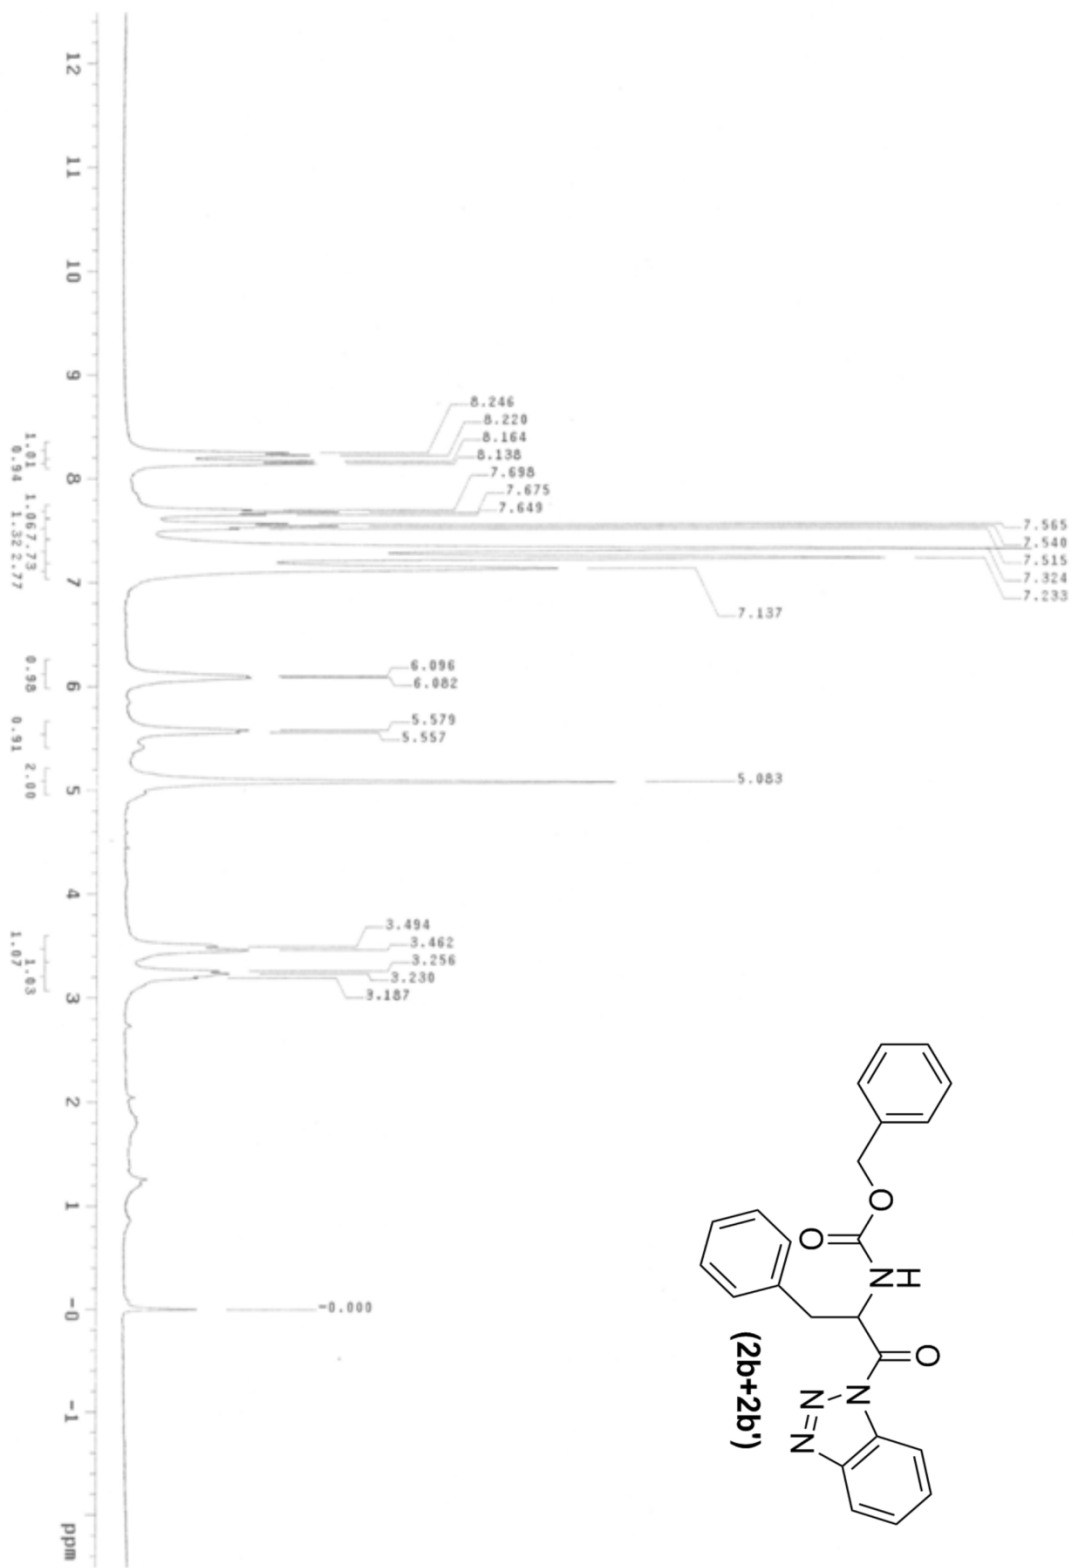

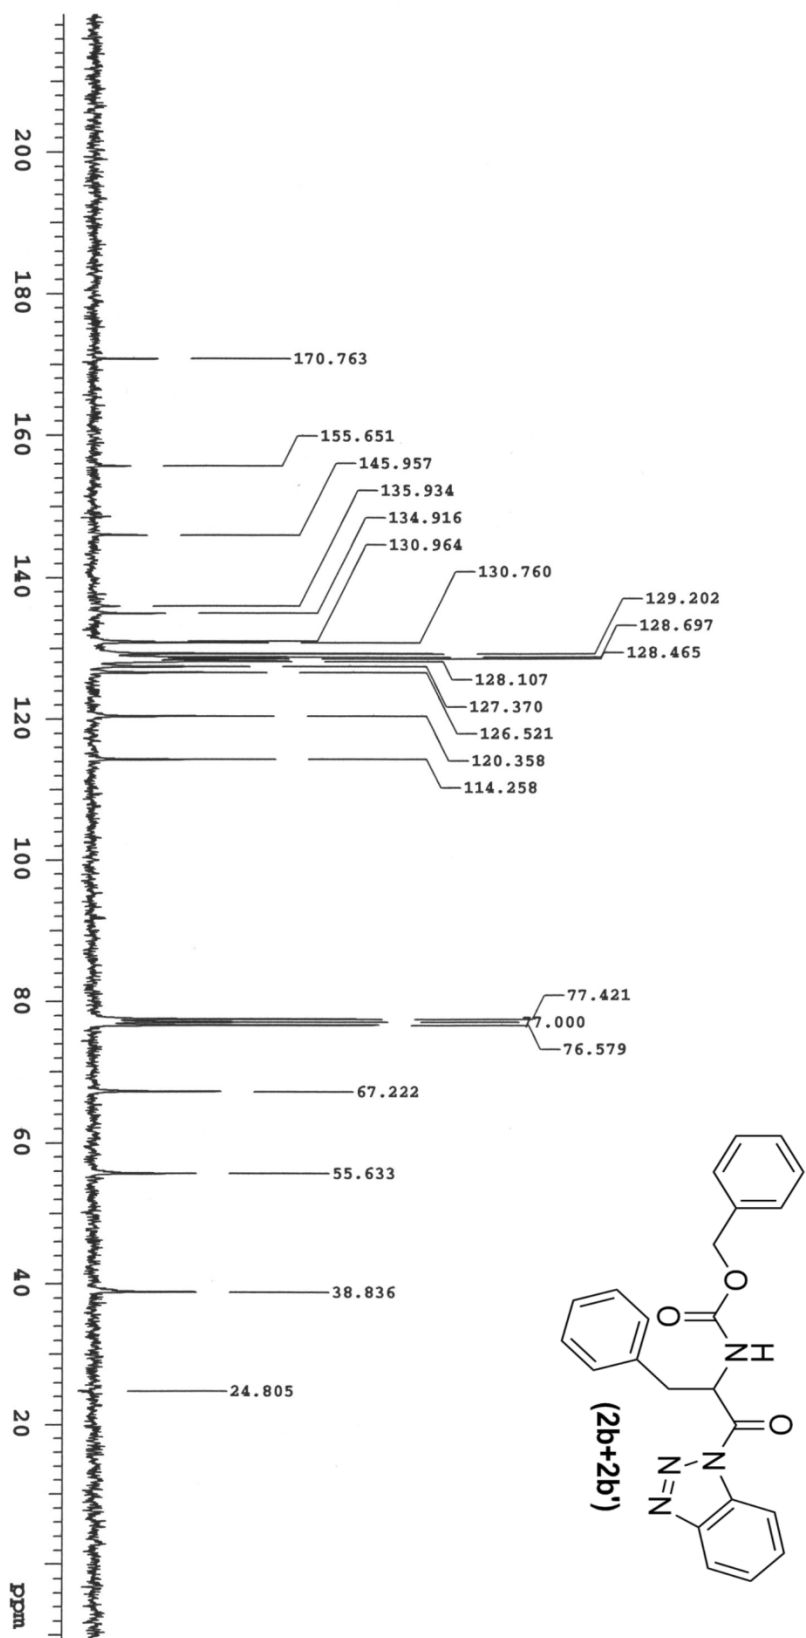

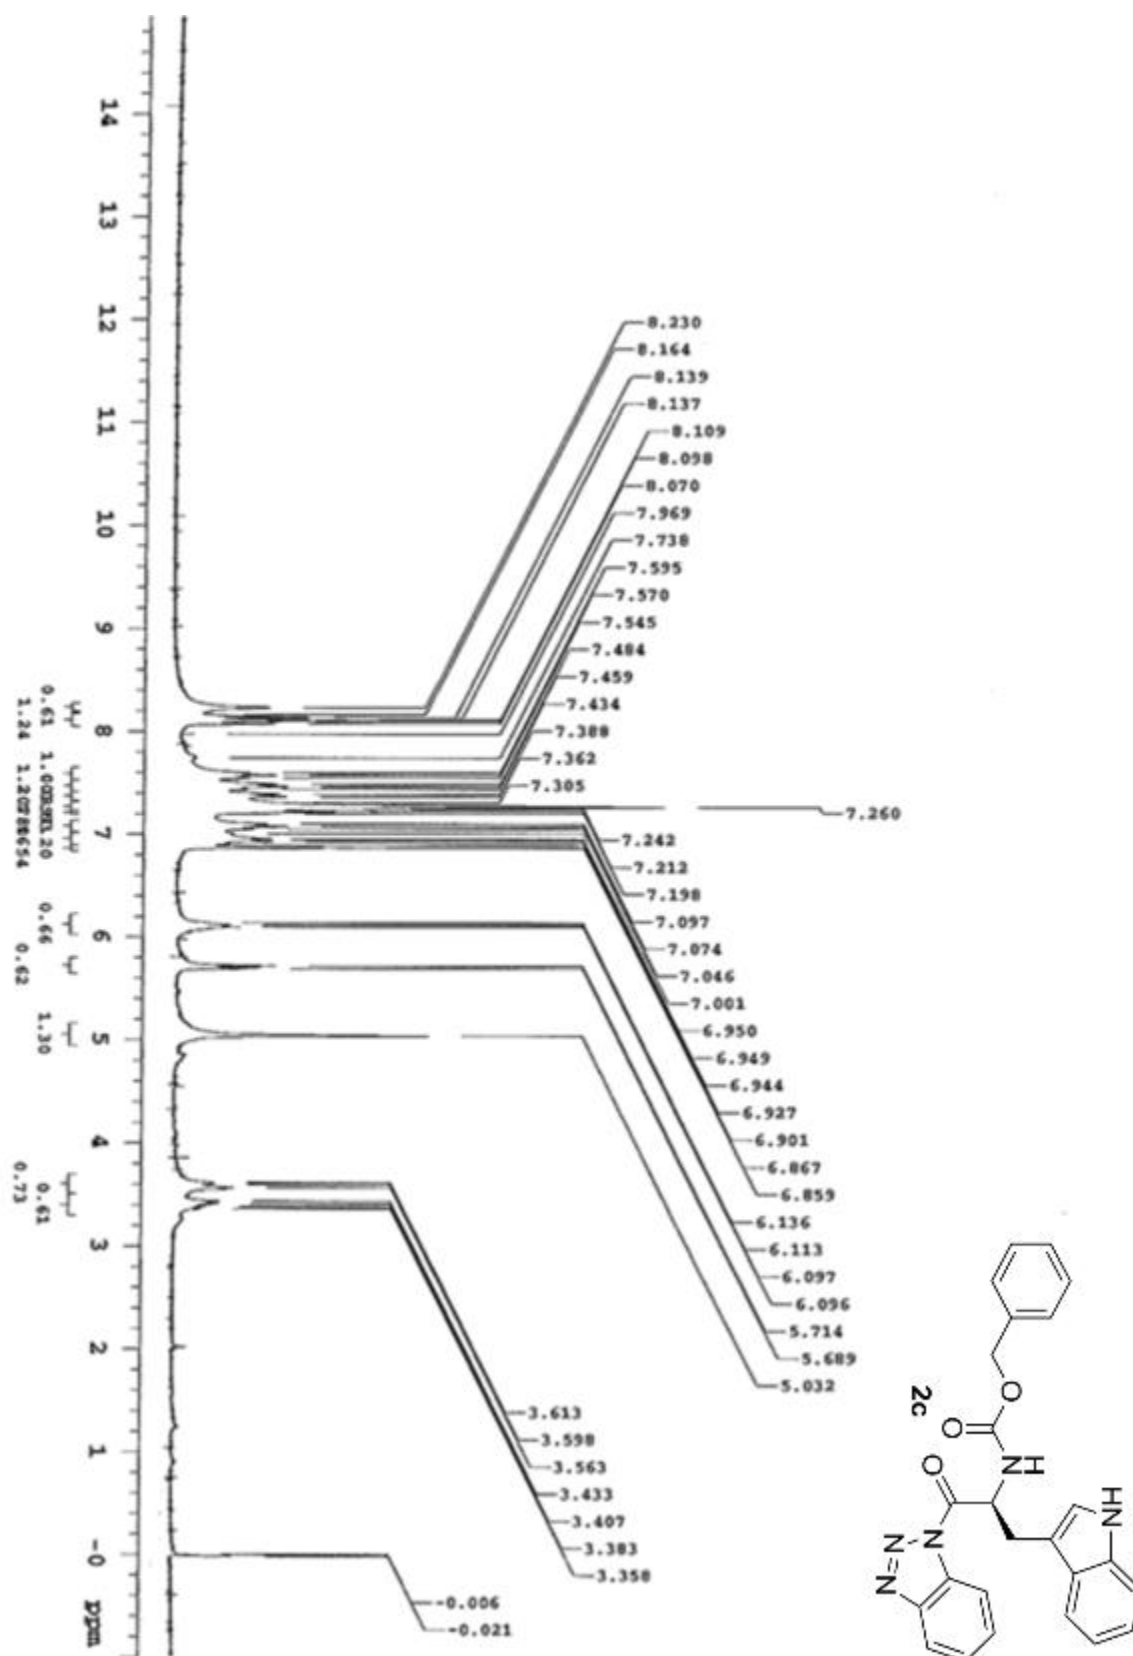



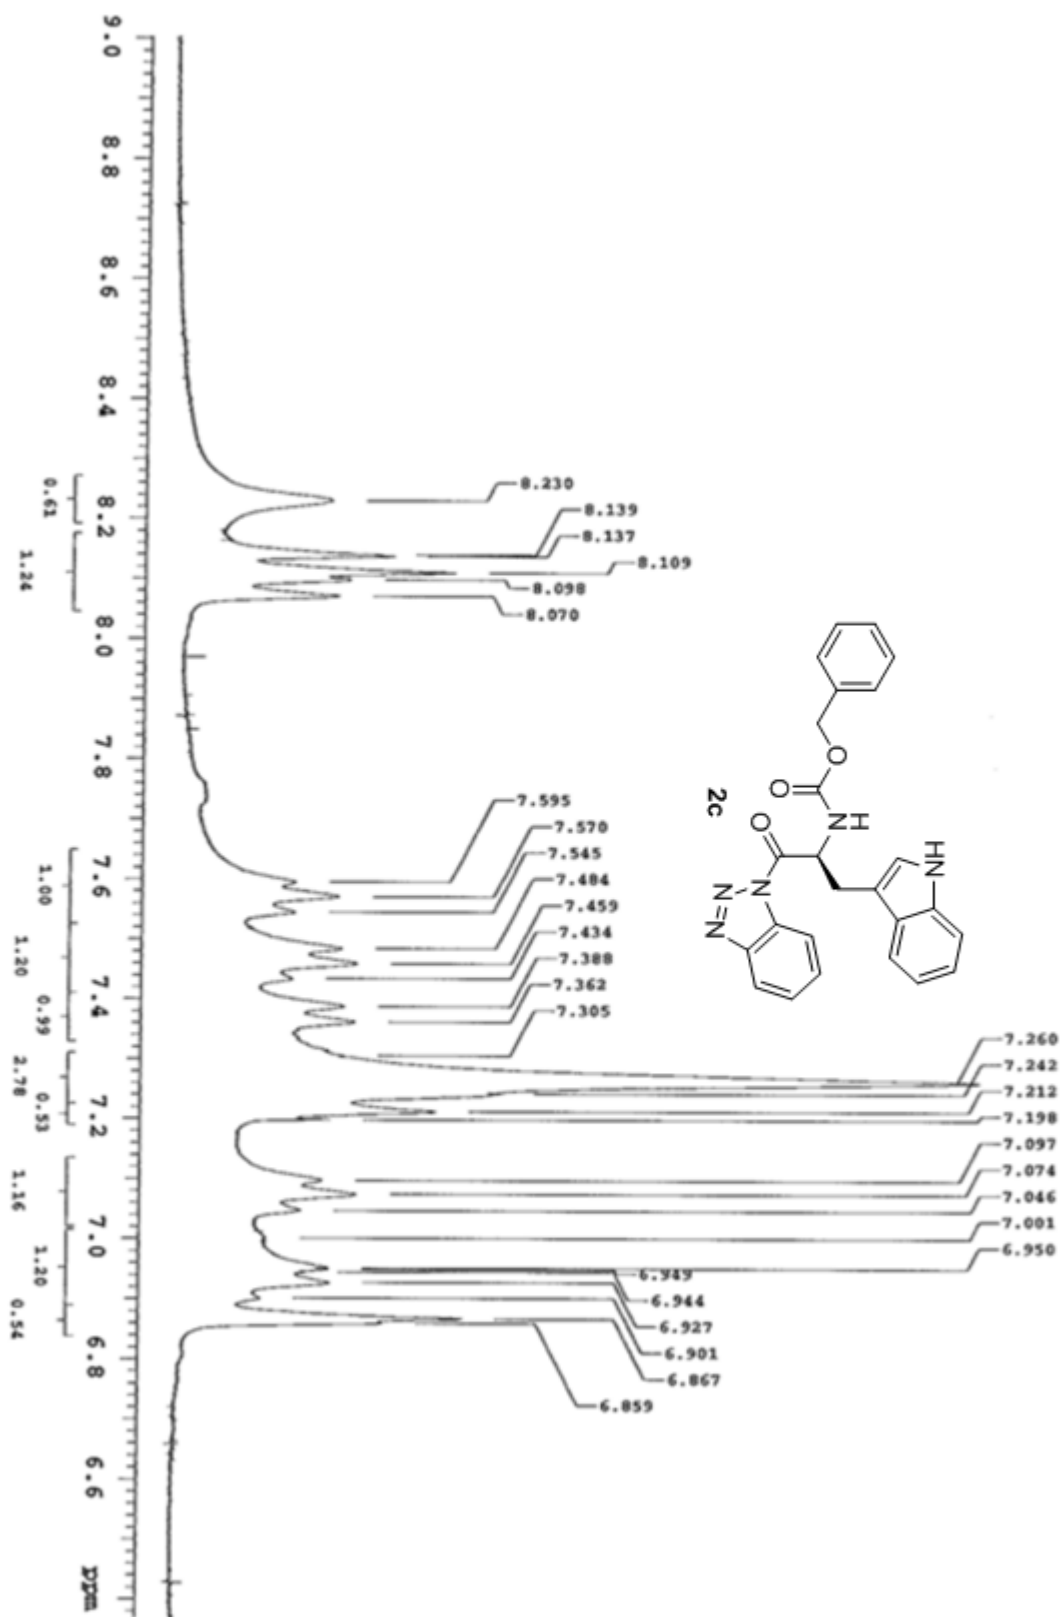

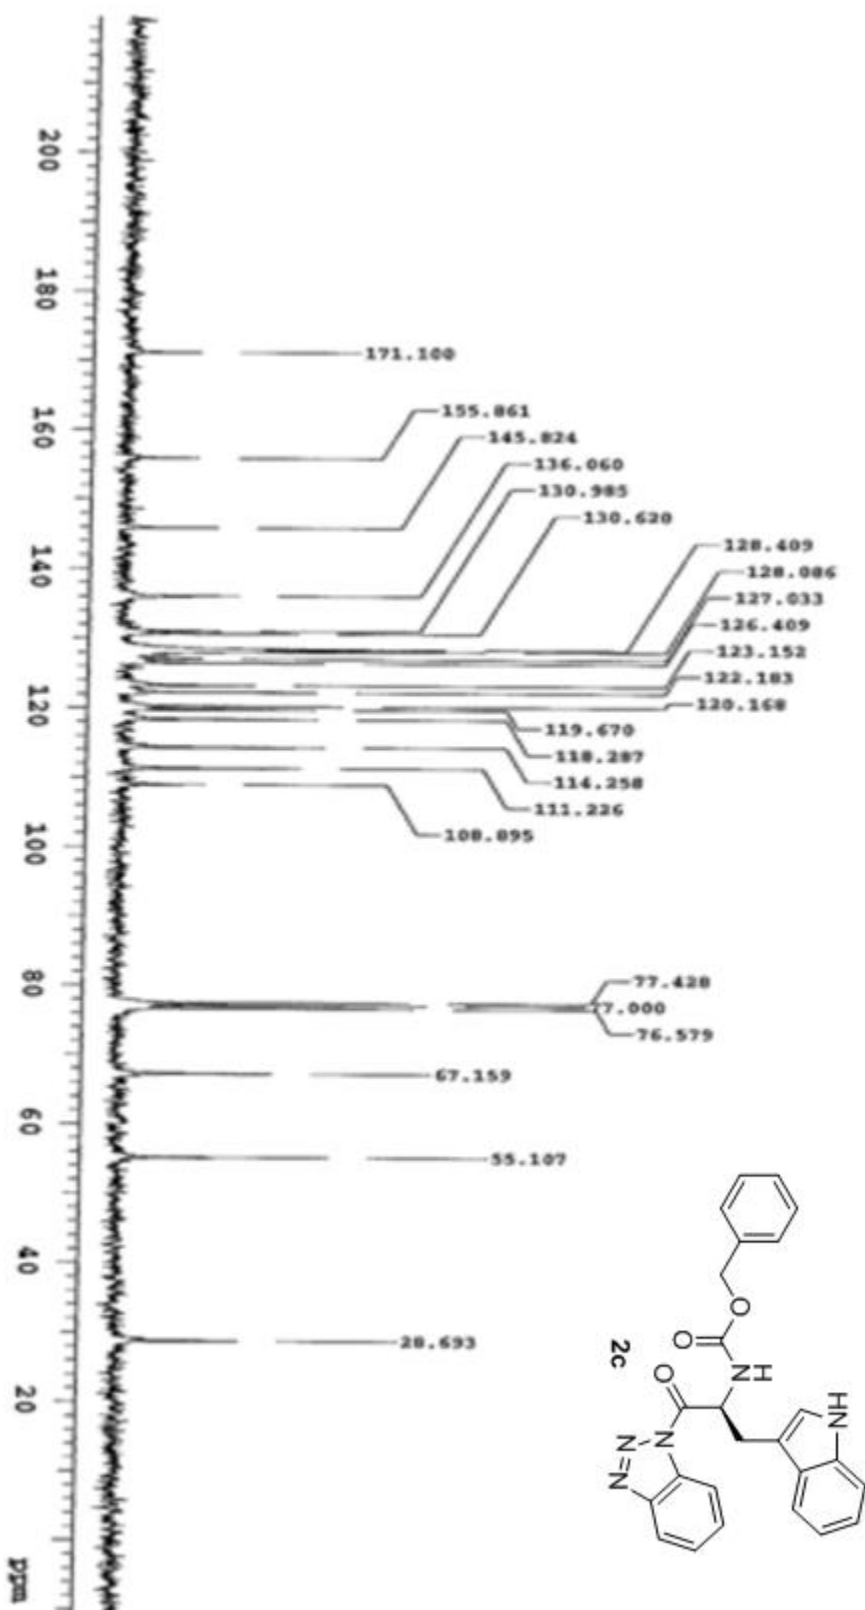

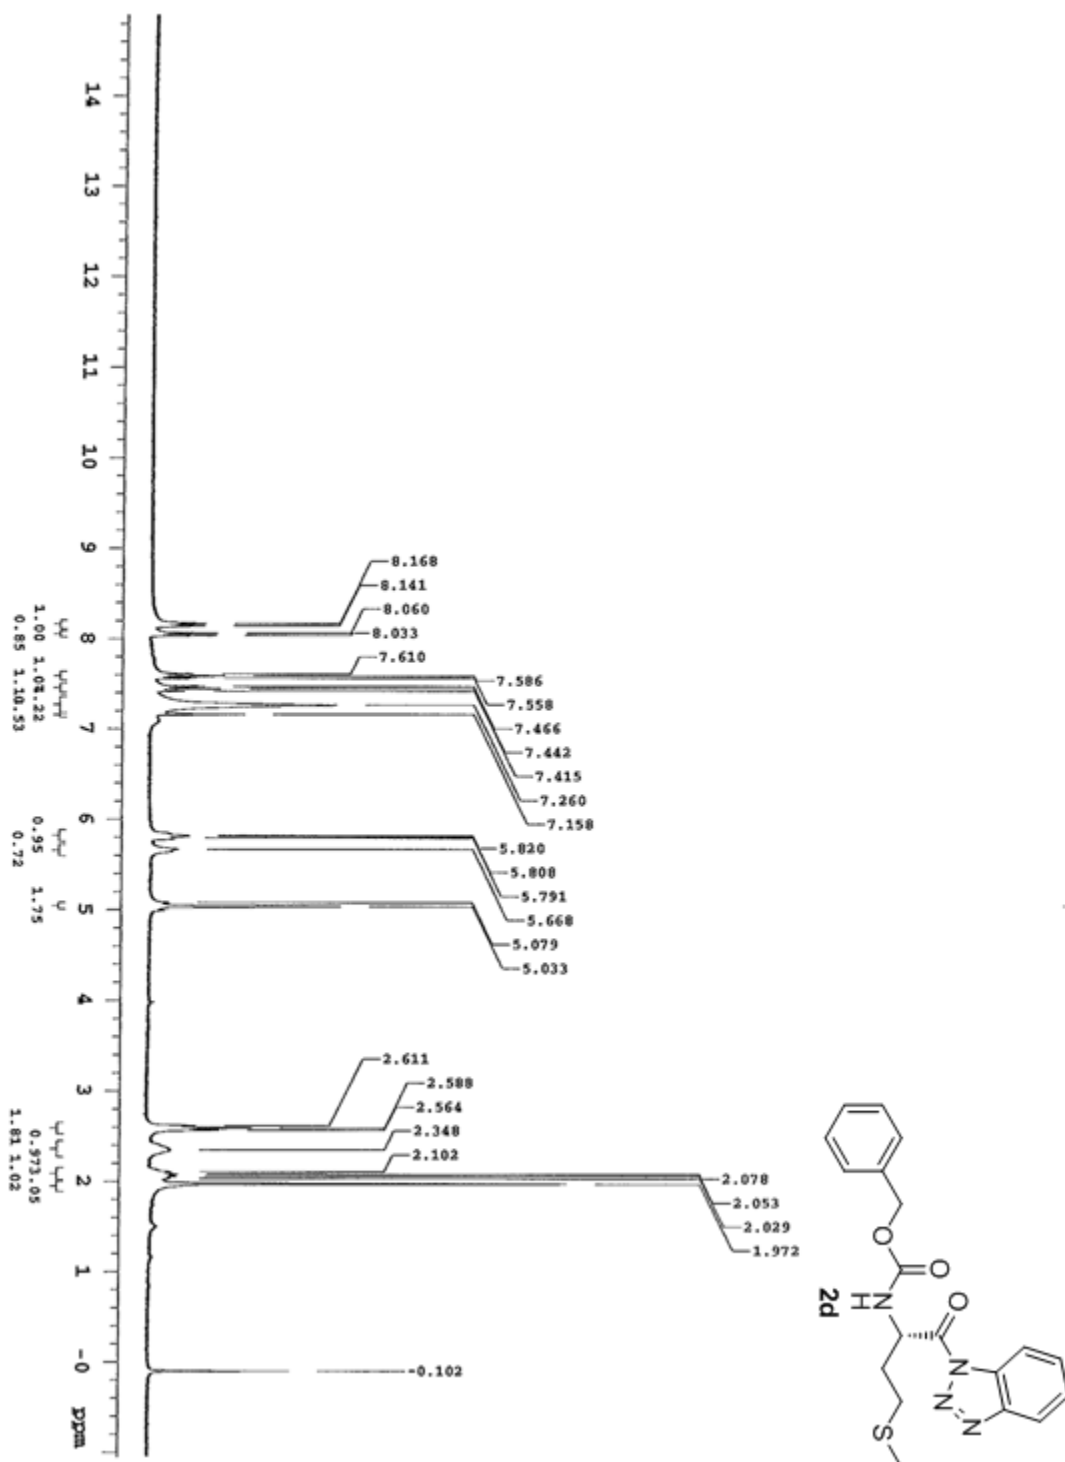

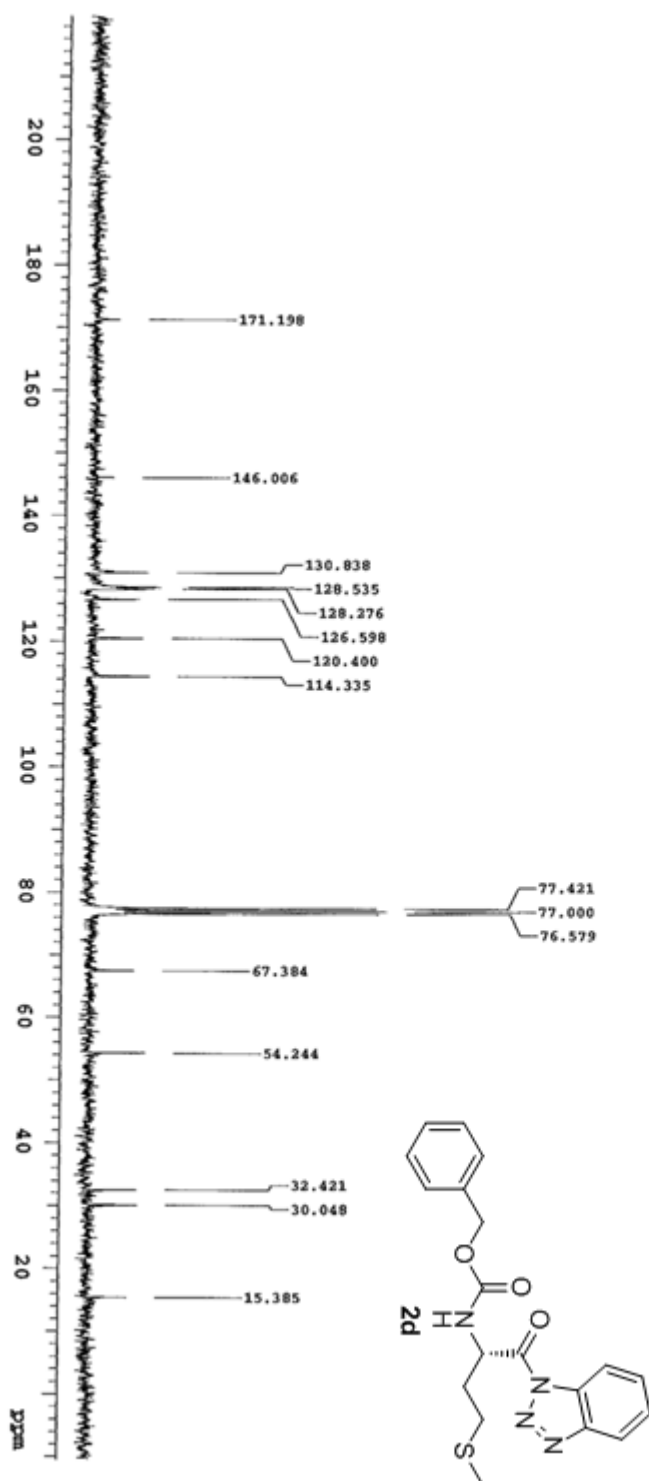

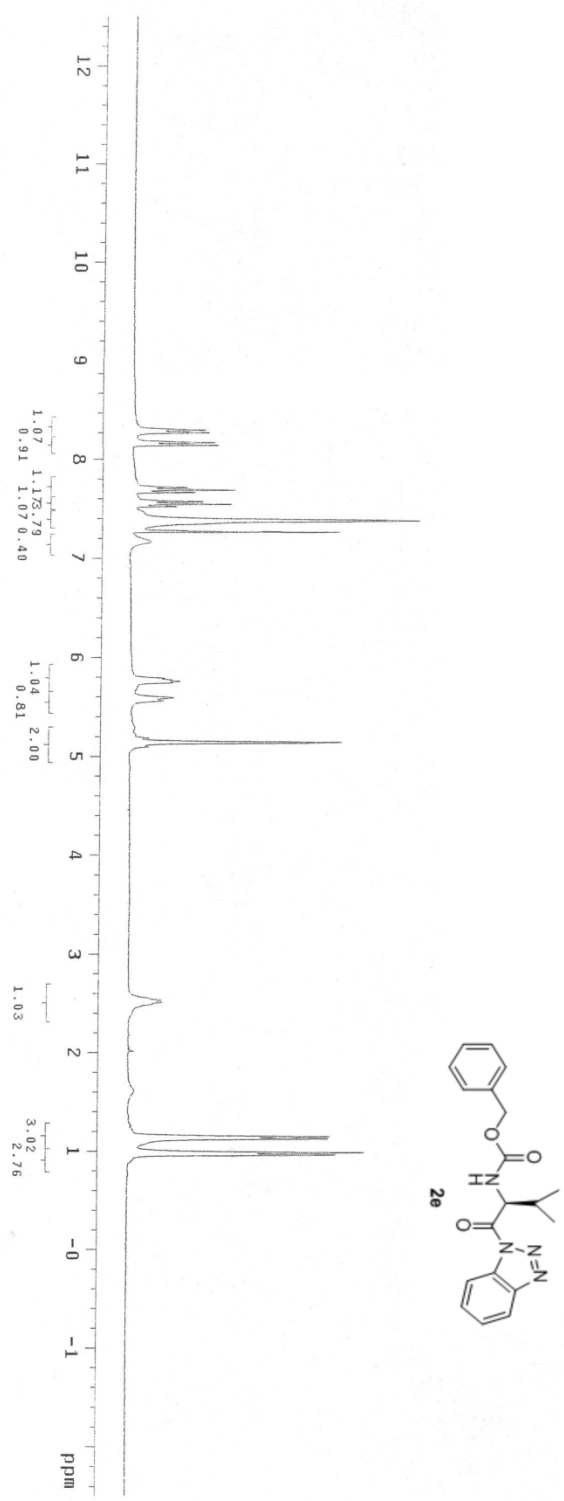

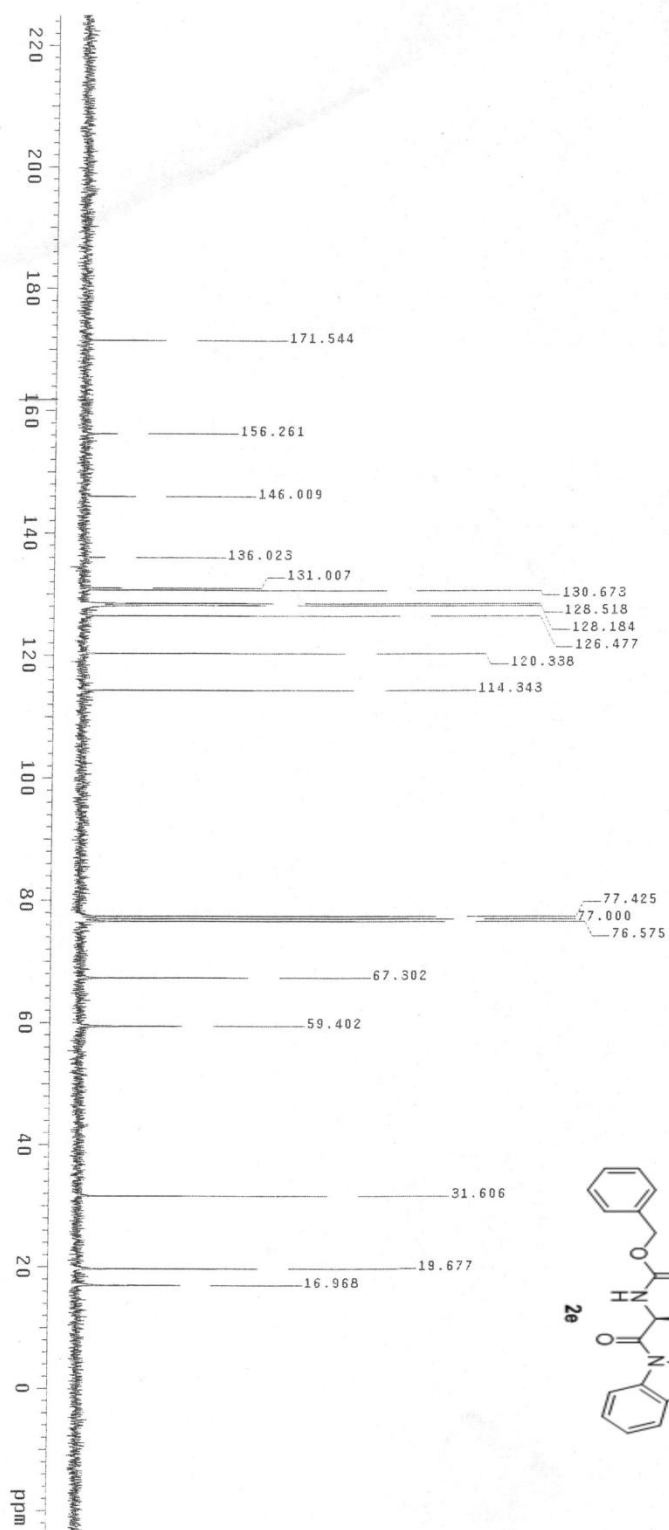

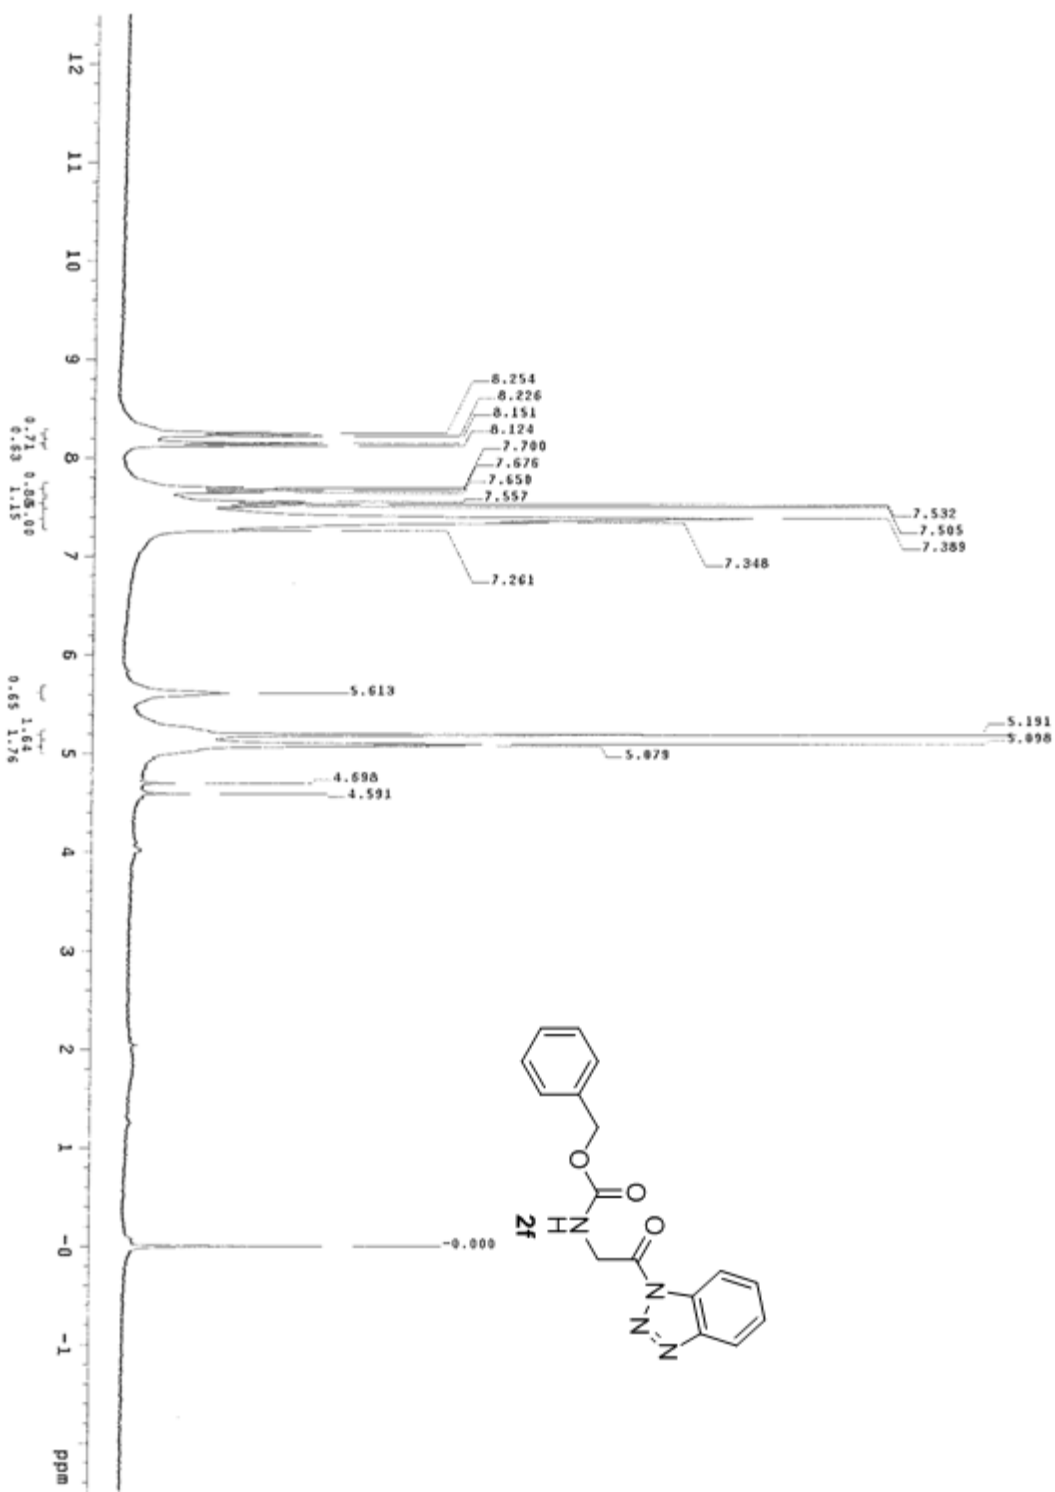

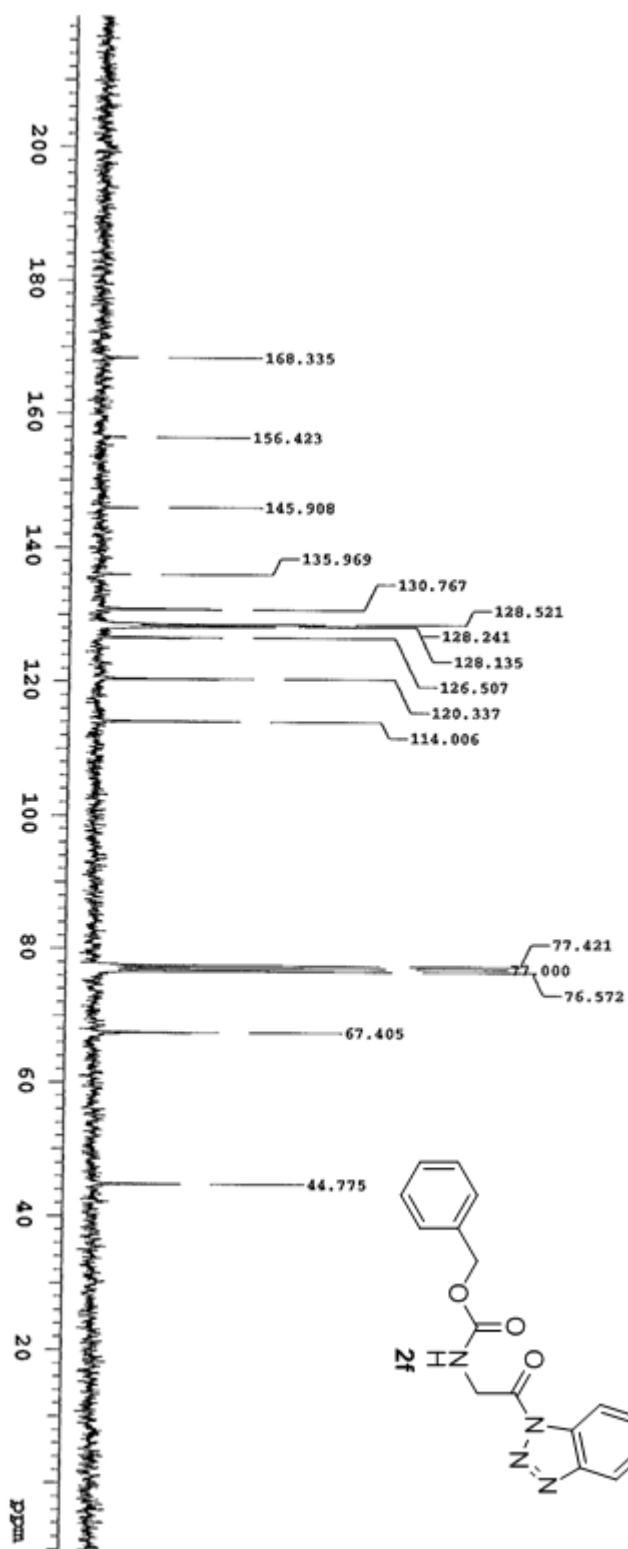



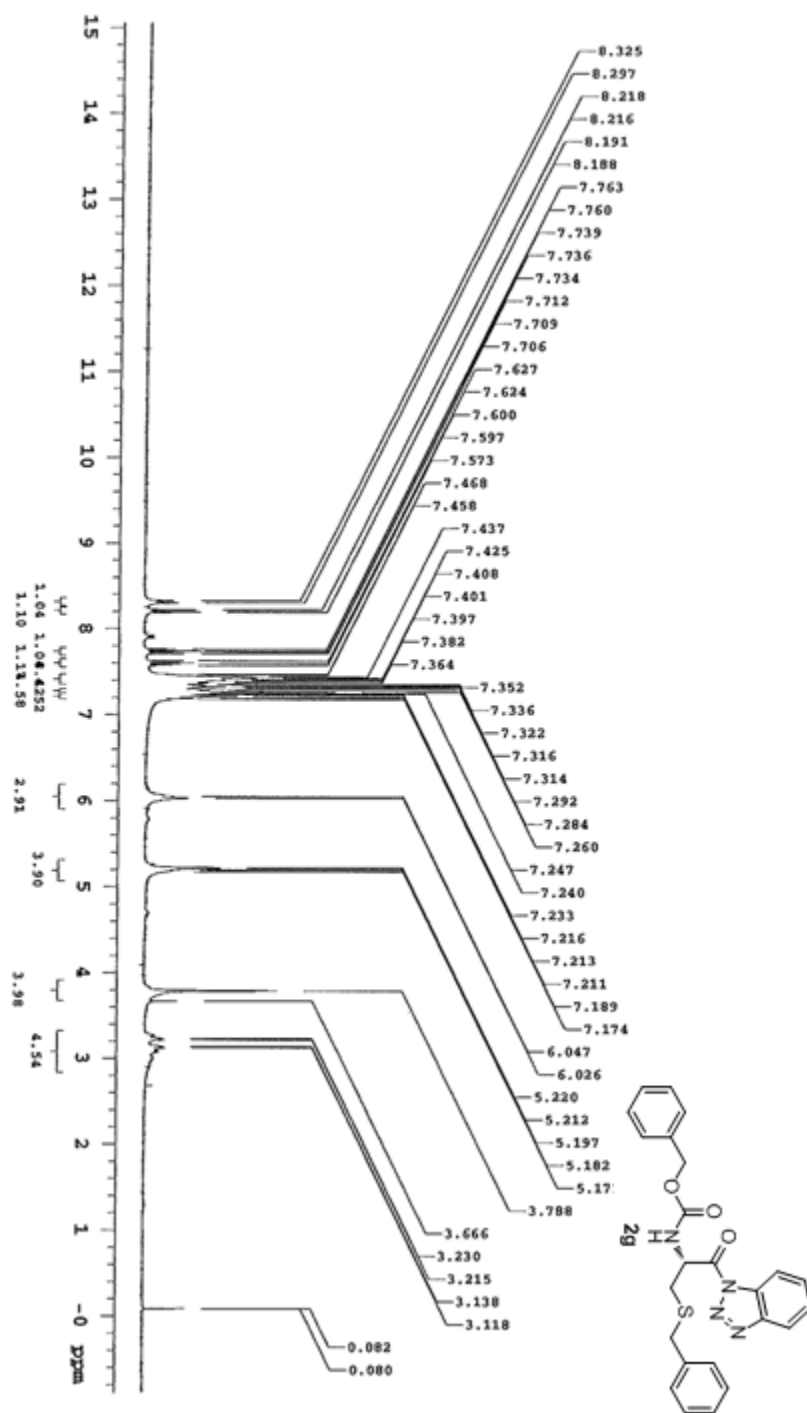

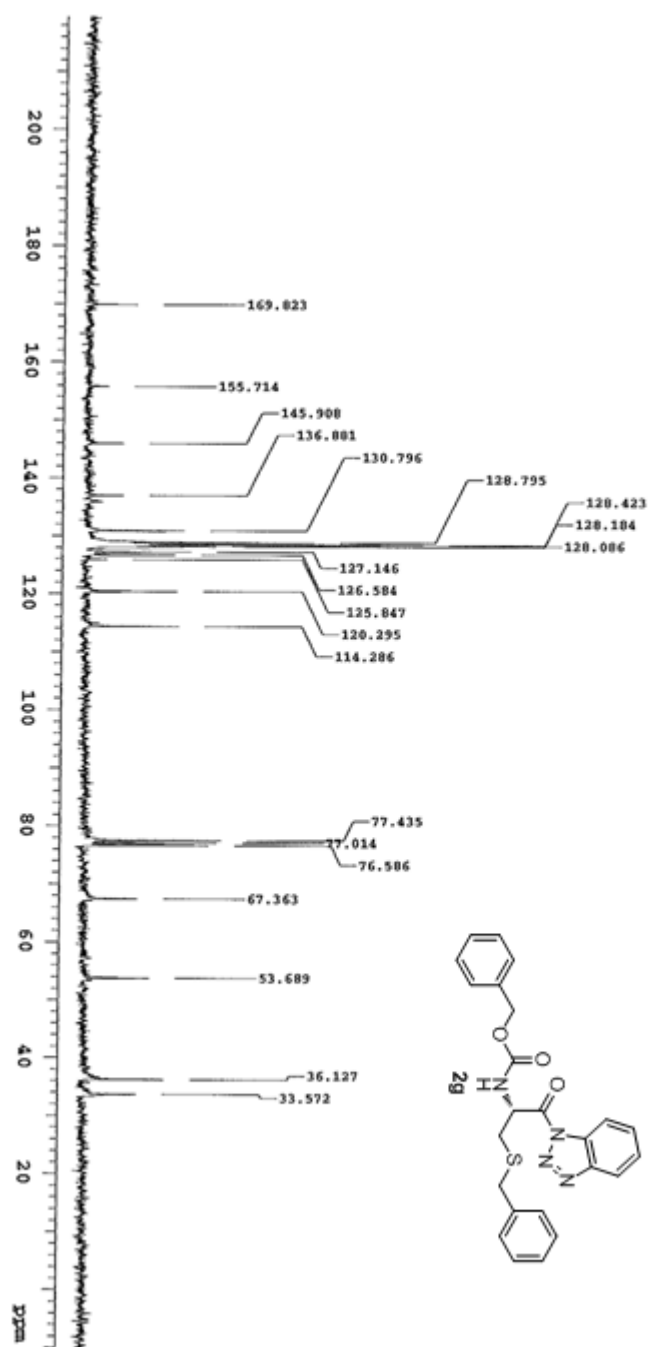

## 2. $^1\text{H}$ NMR and $^{13}\text{C}$ NMR spectra for compounds **3a-h**.

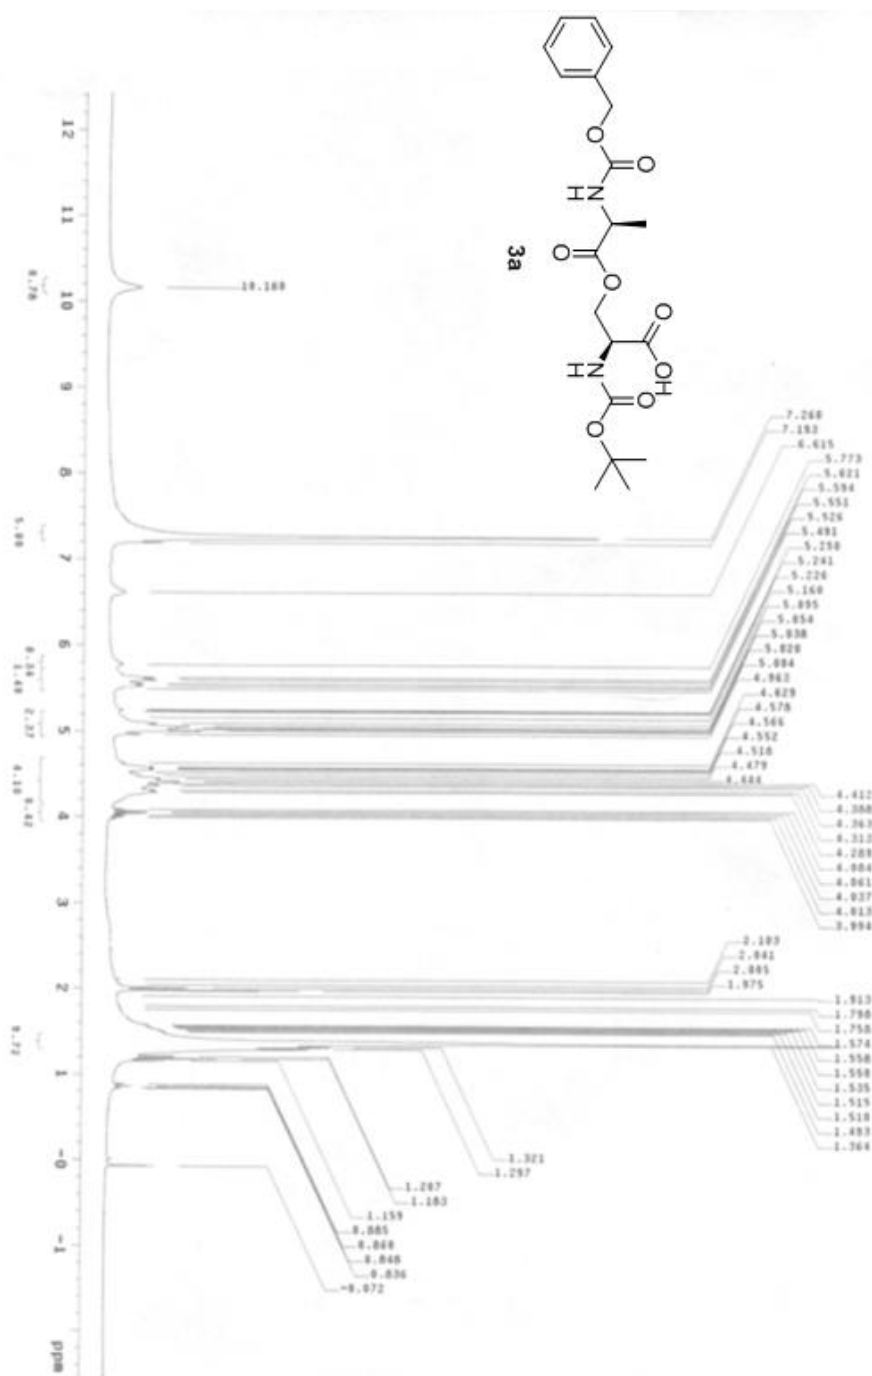

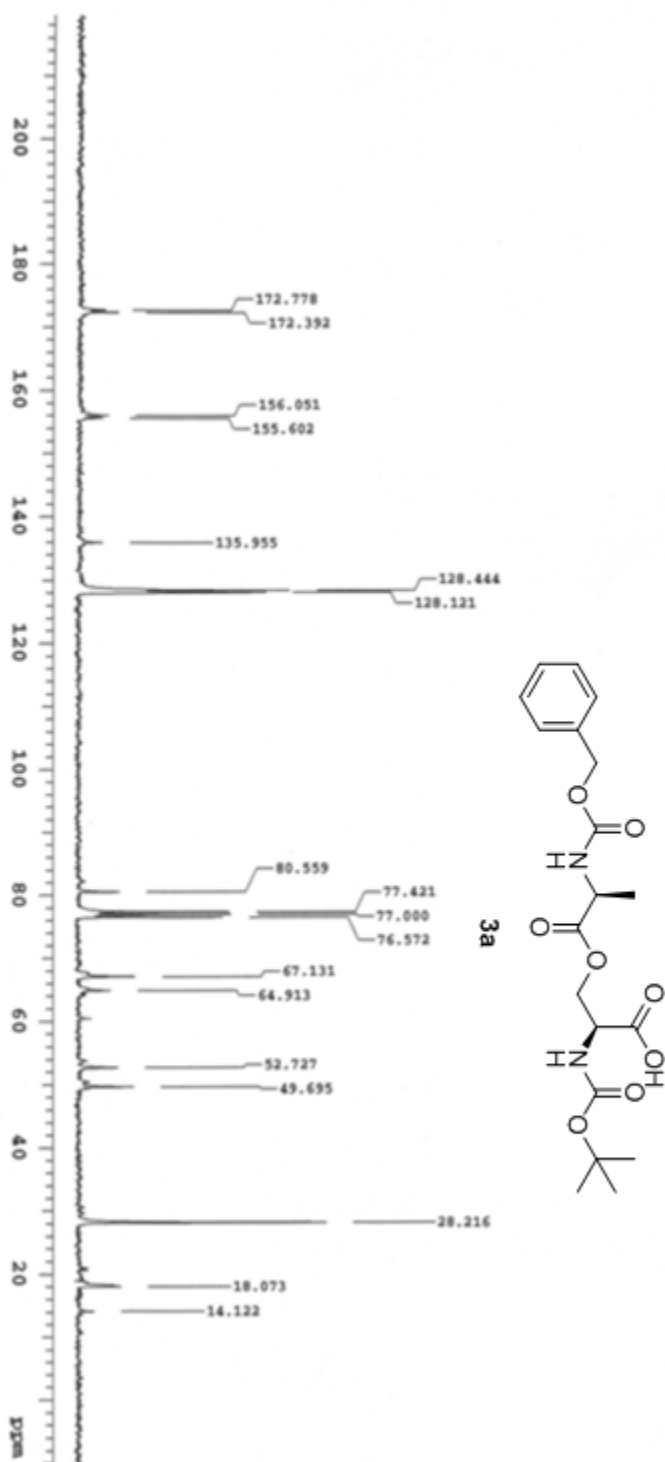

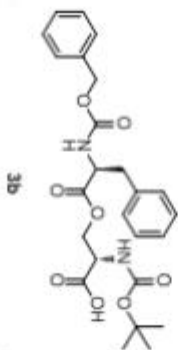

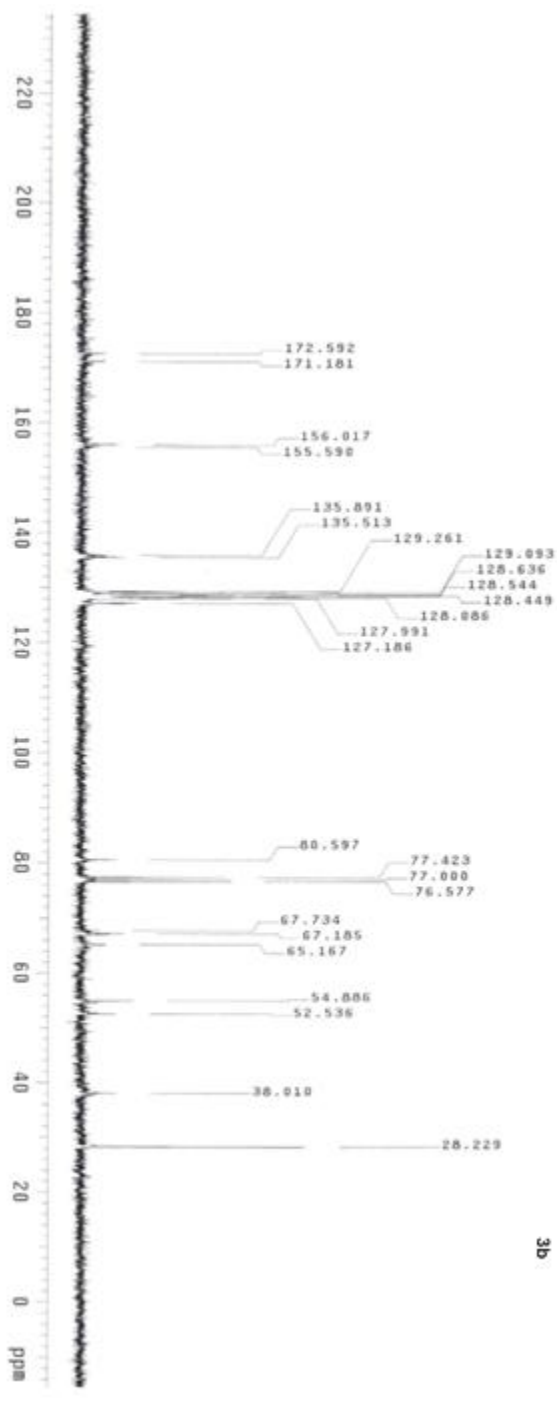

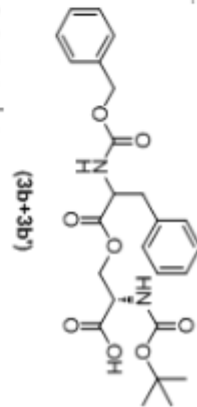

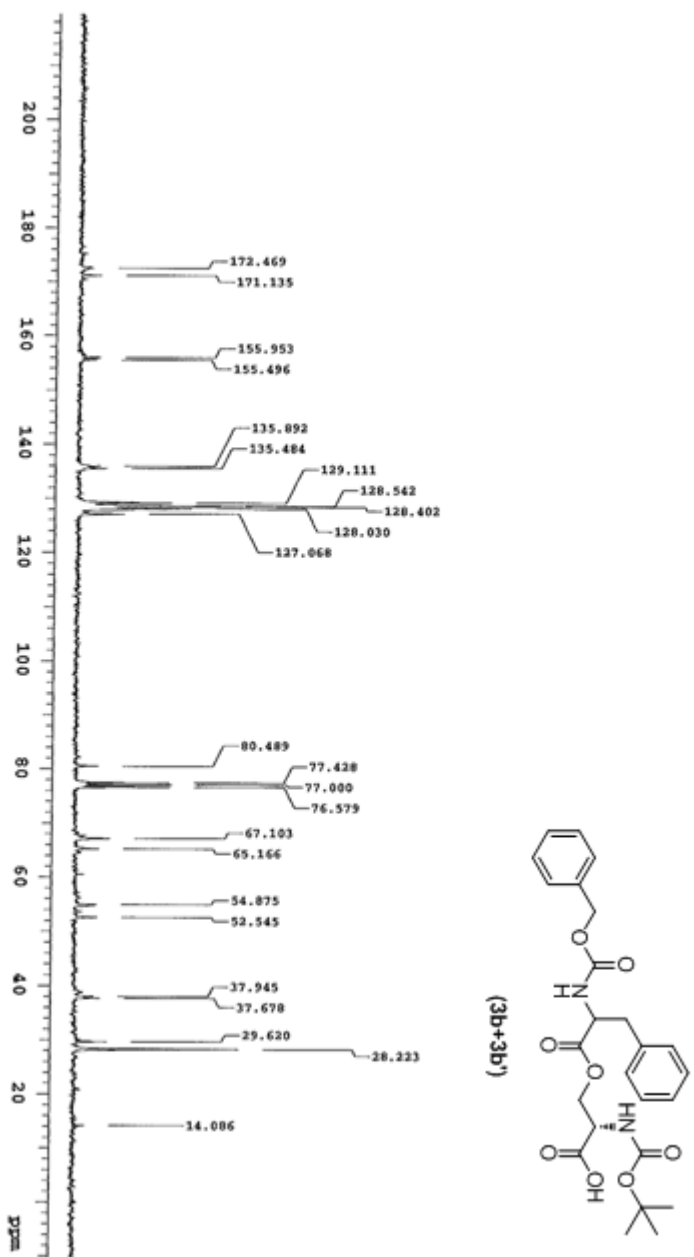



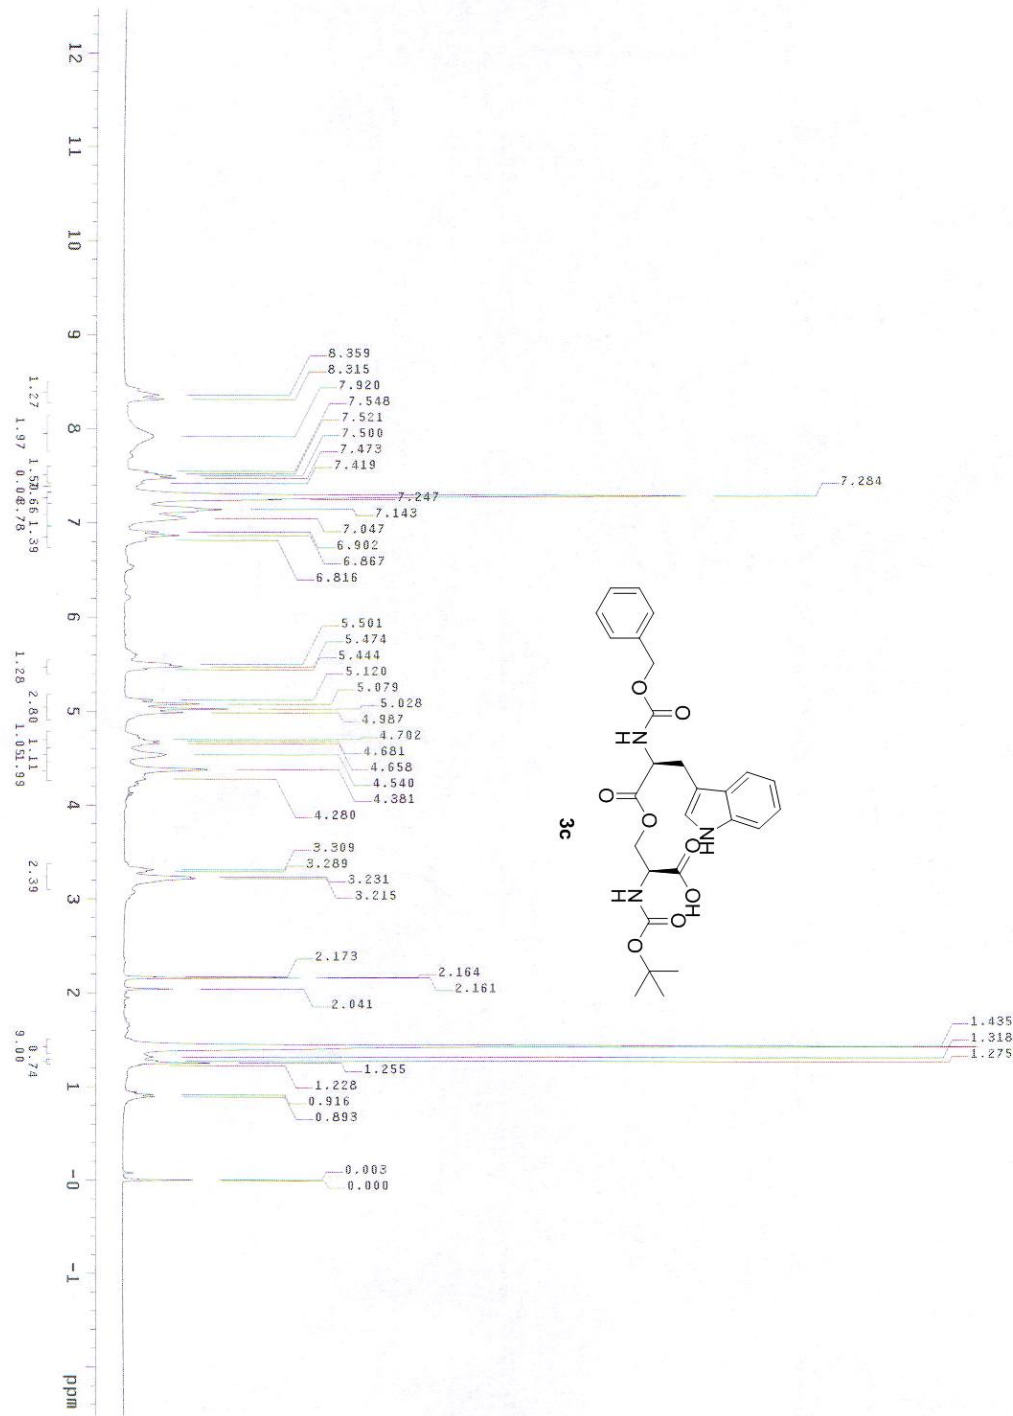

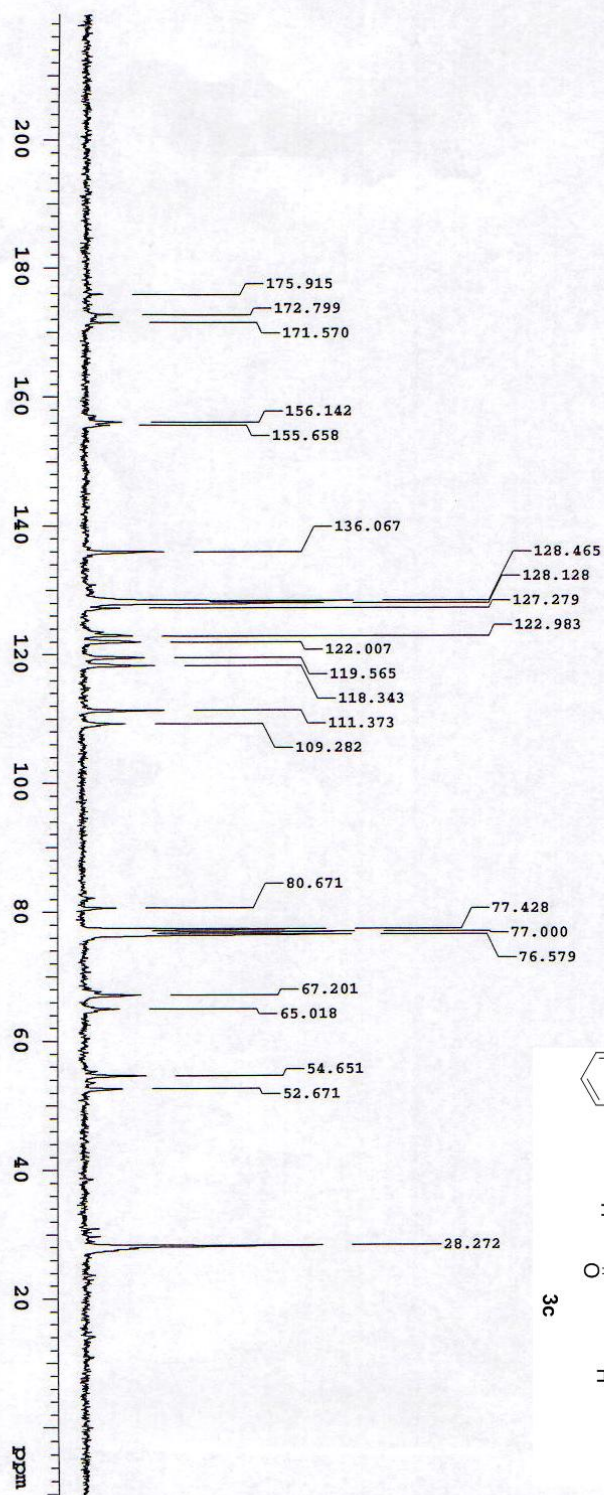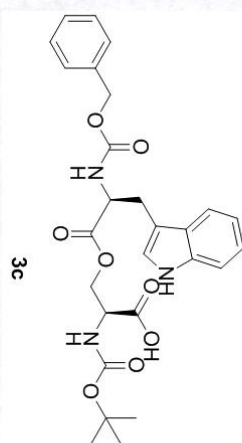

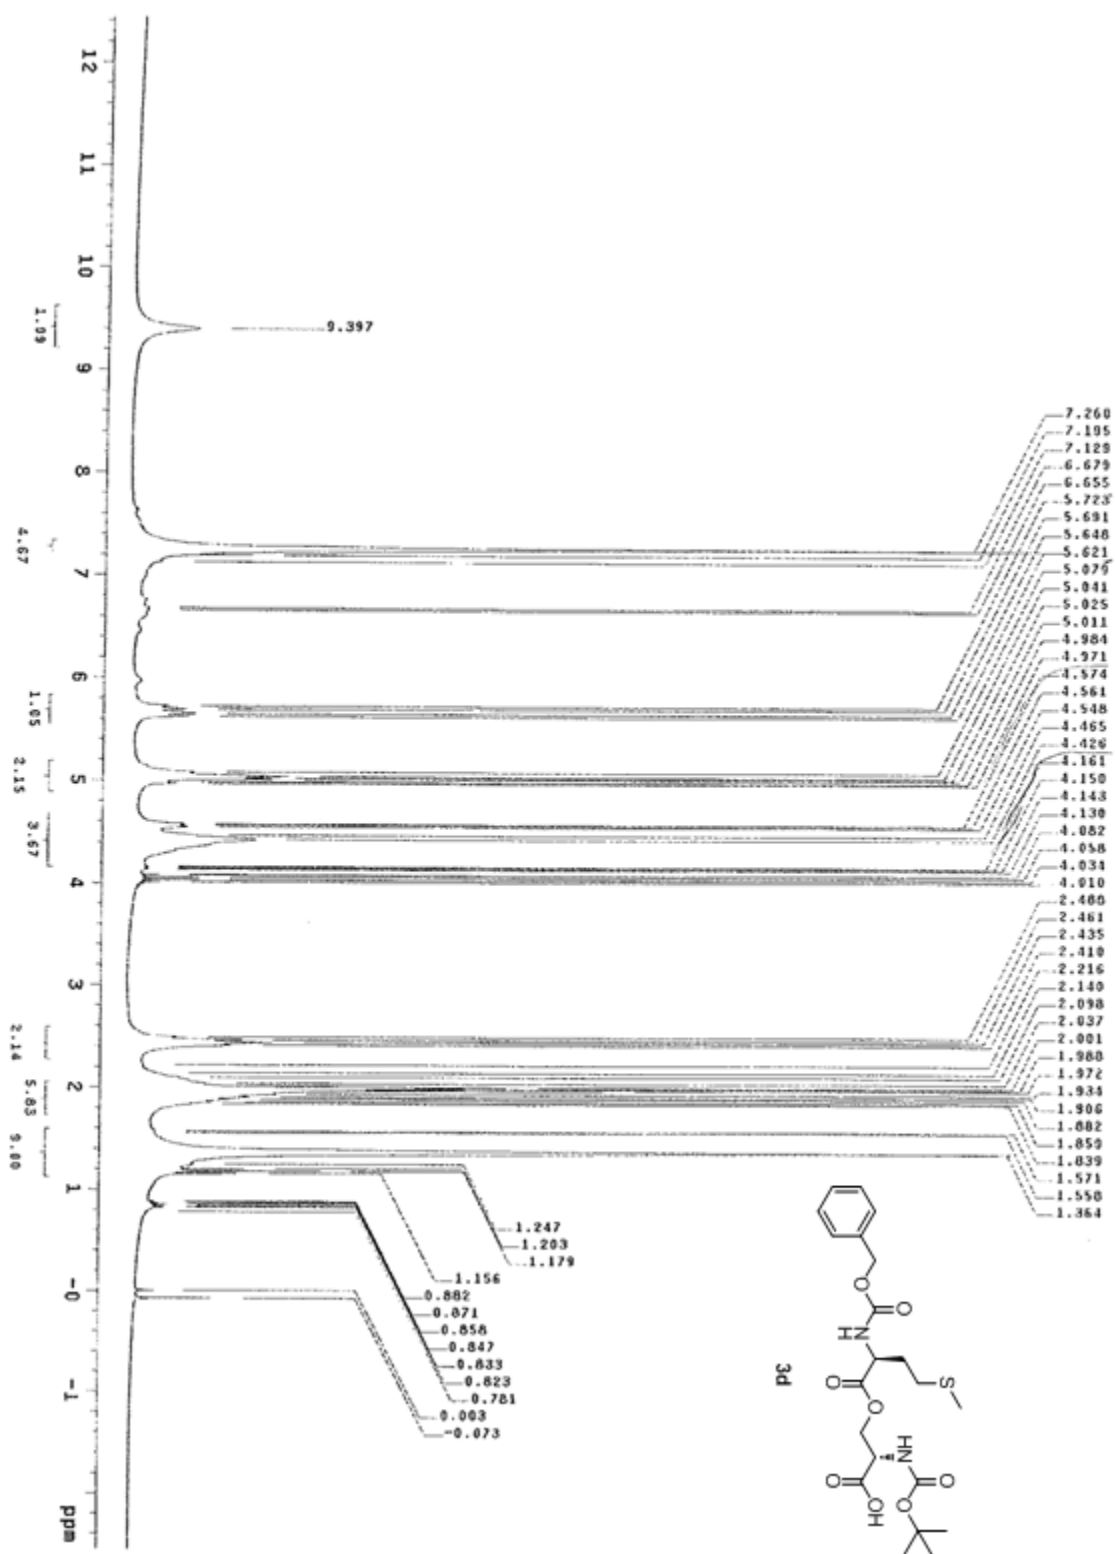

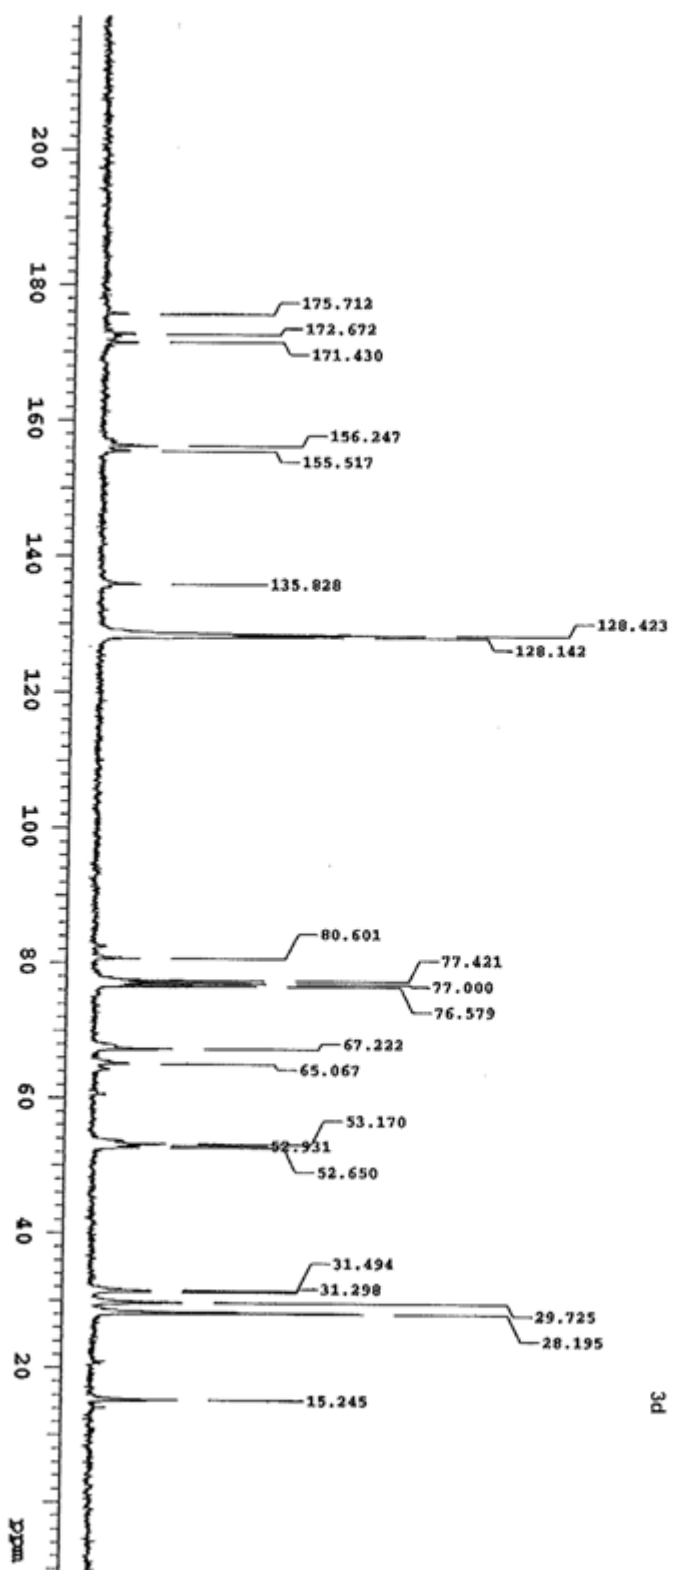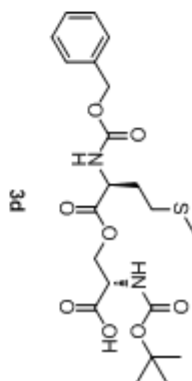

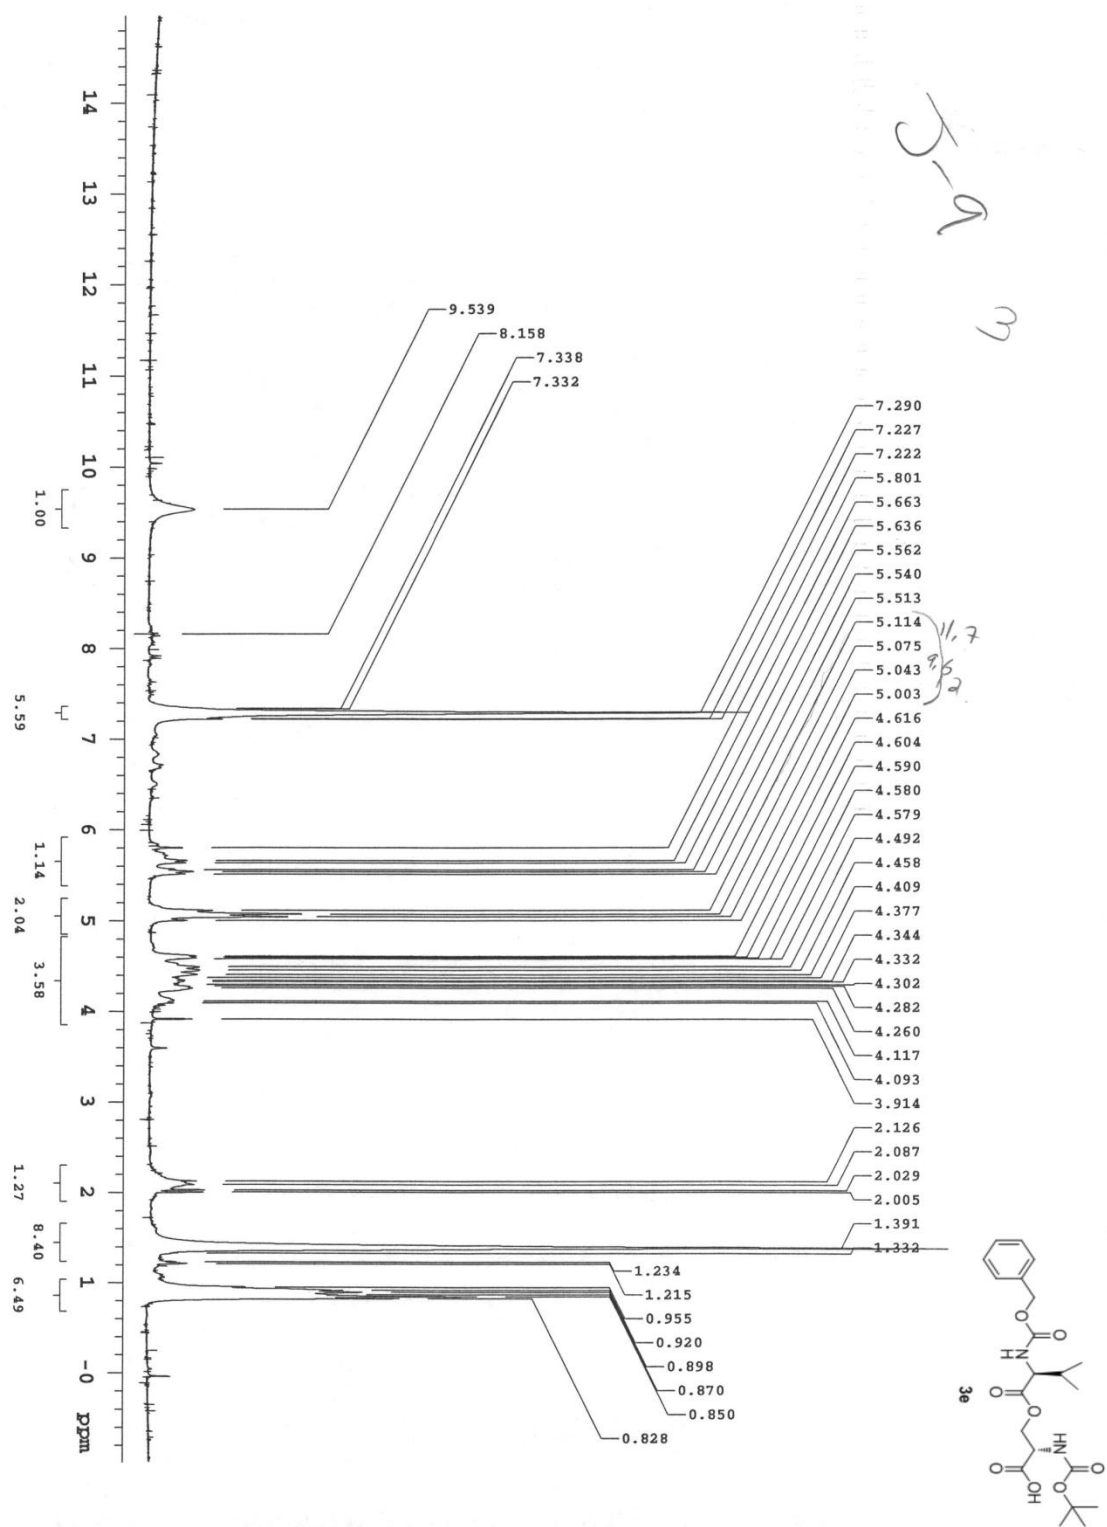

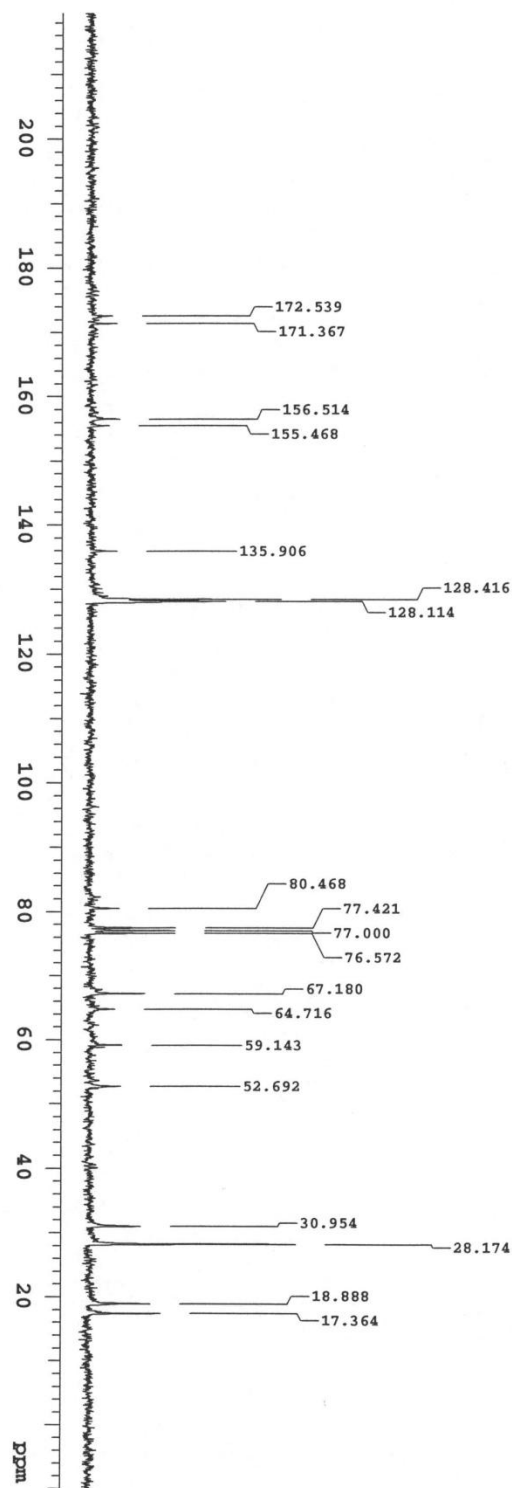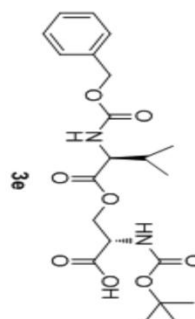

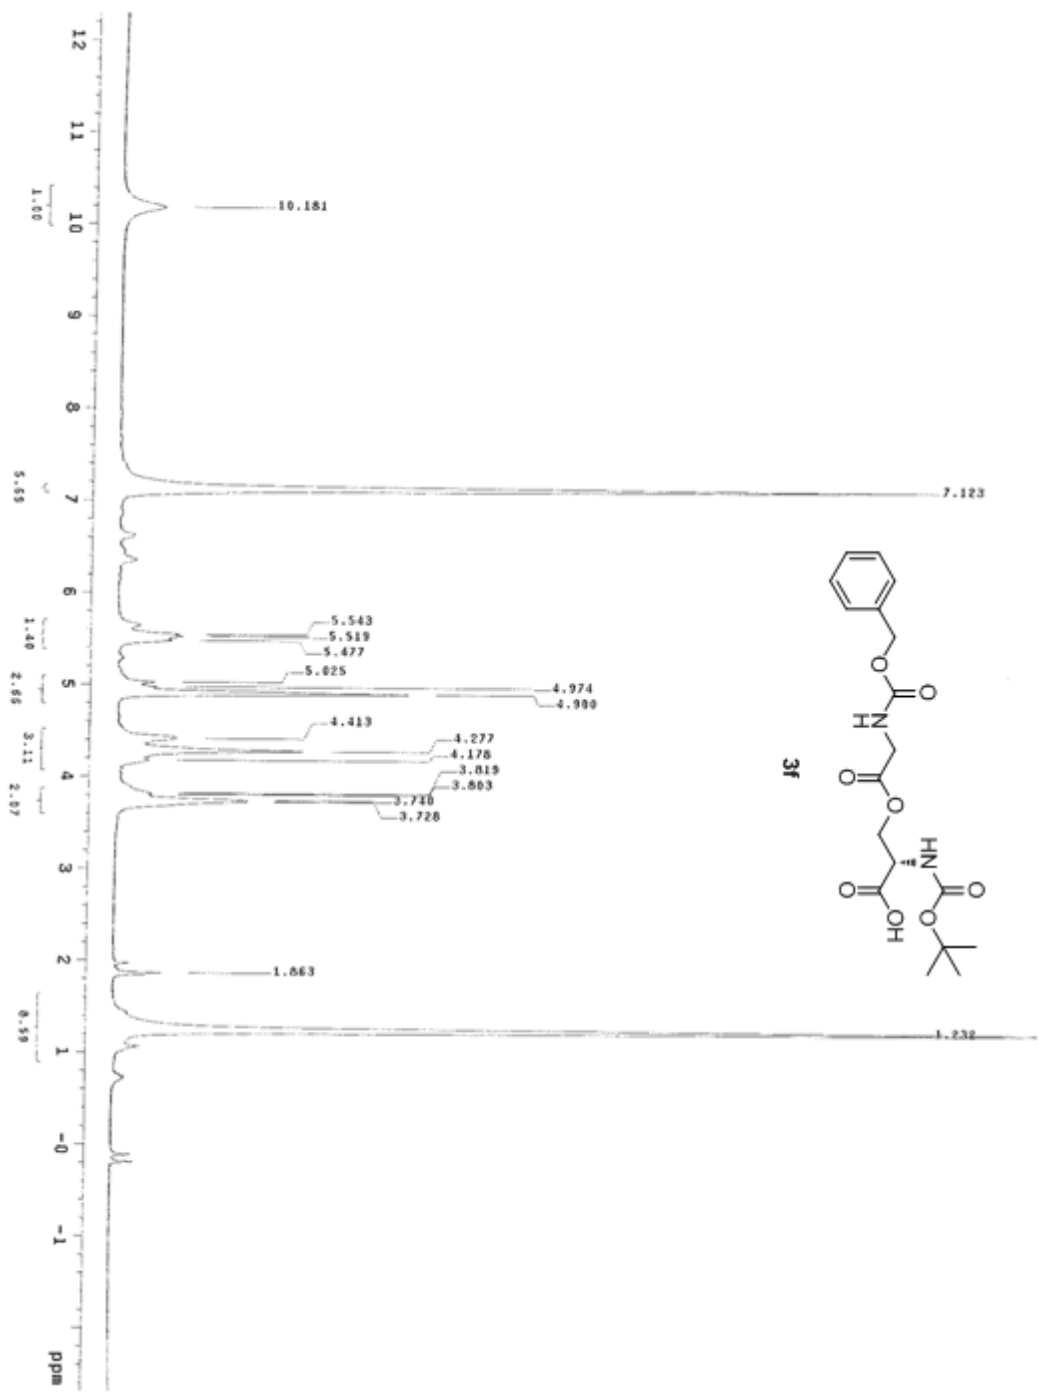

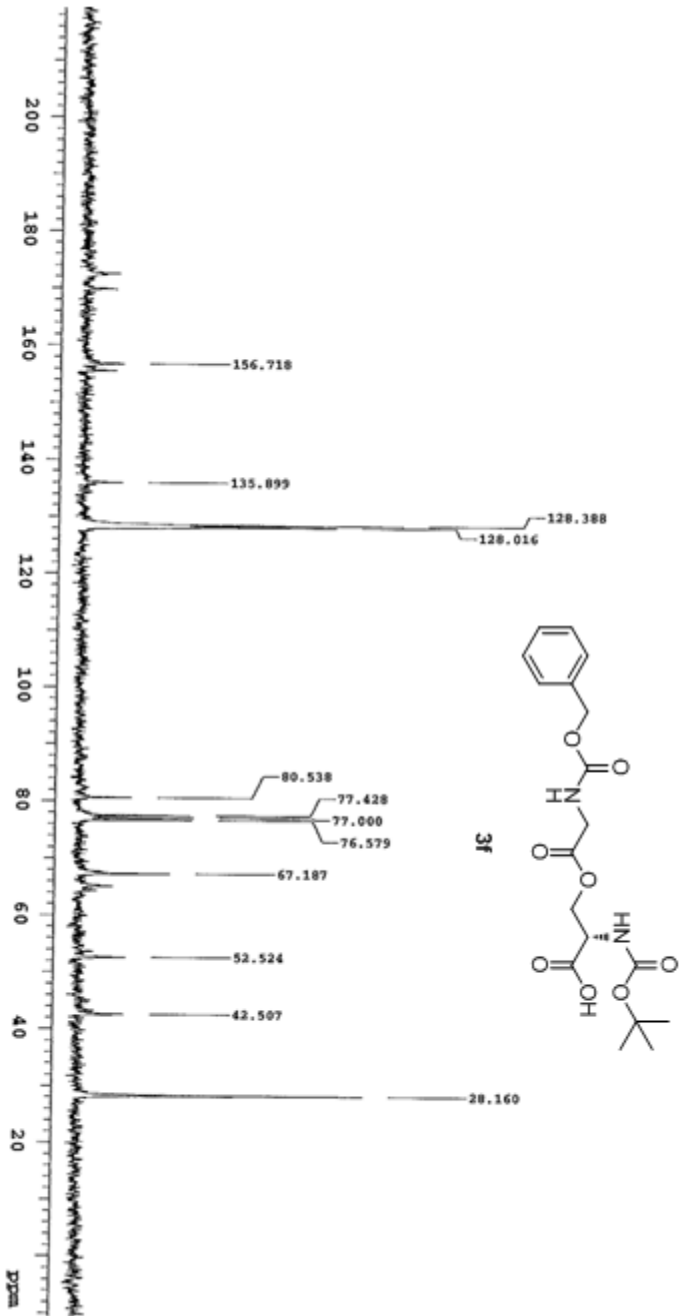



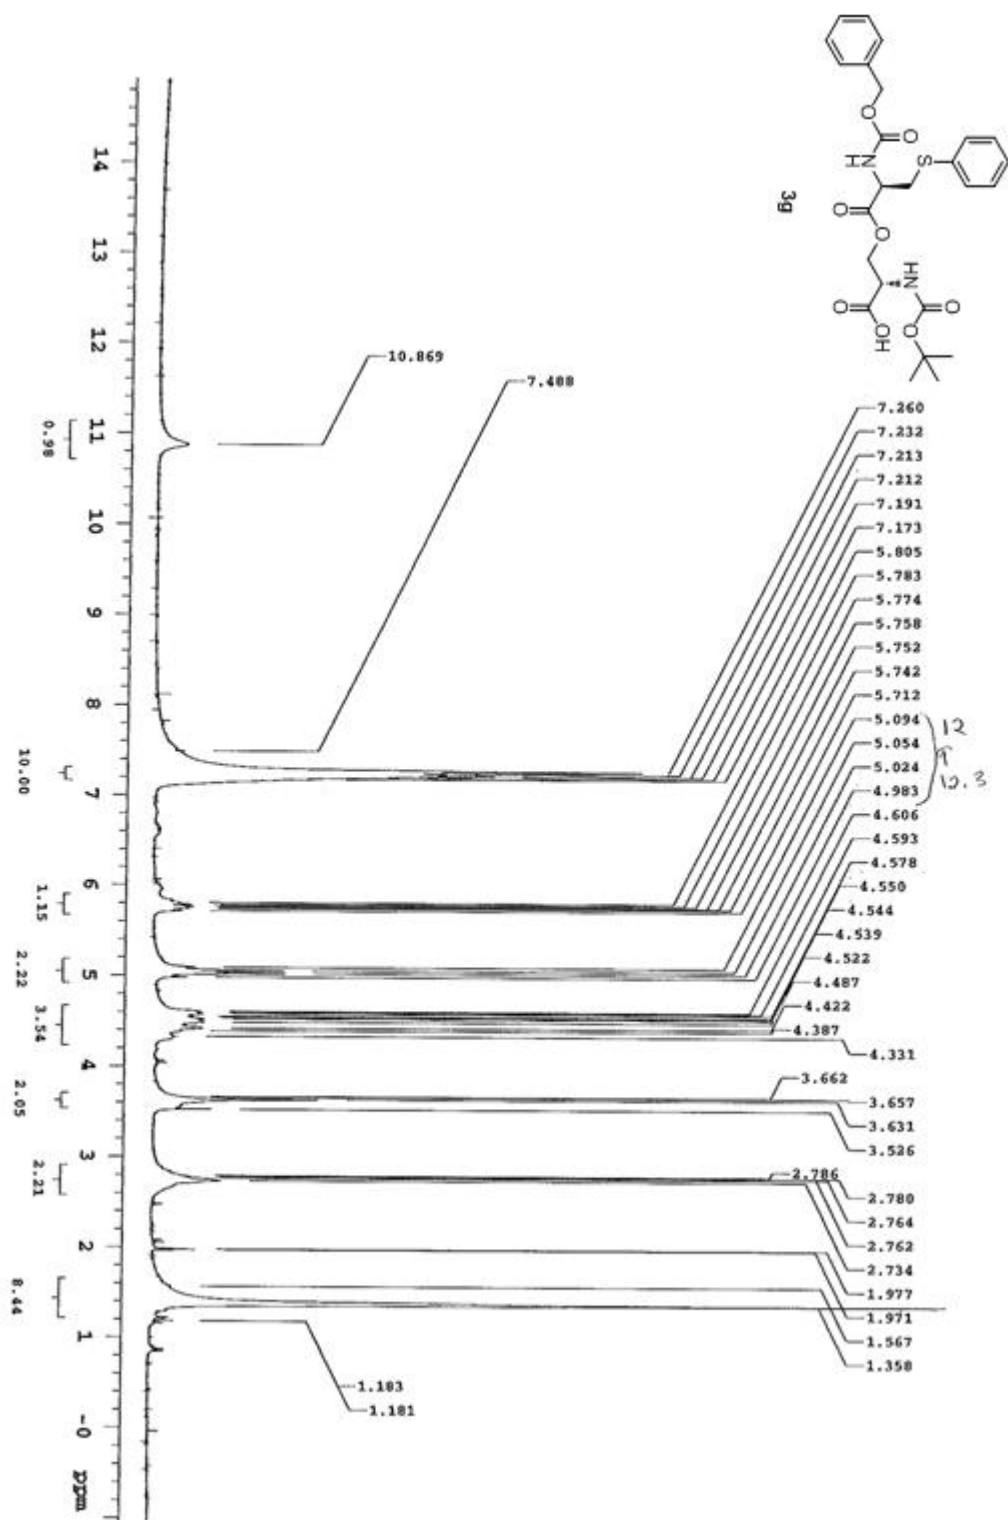

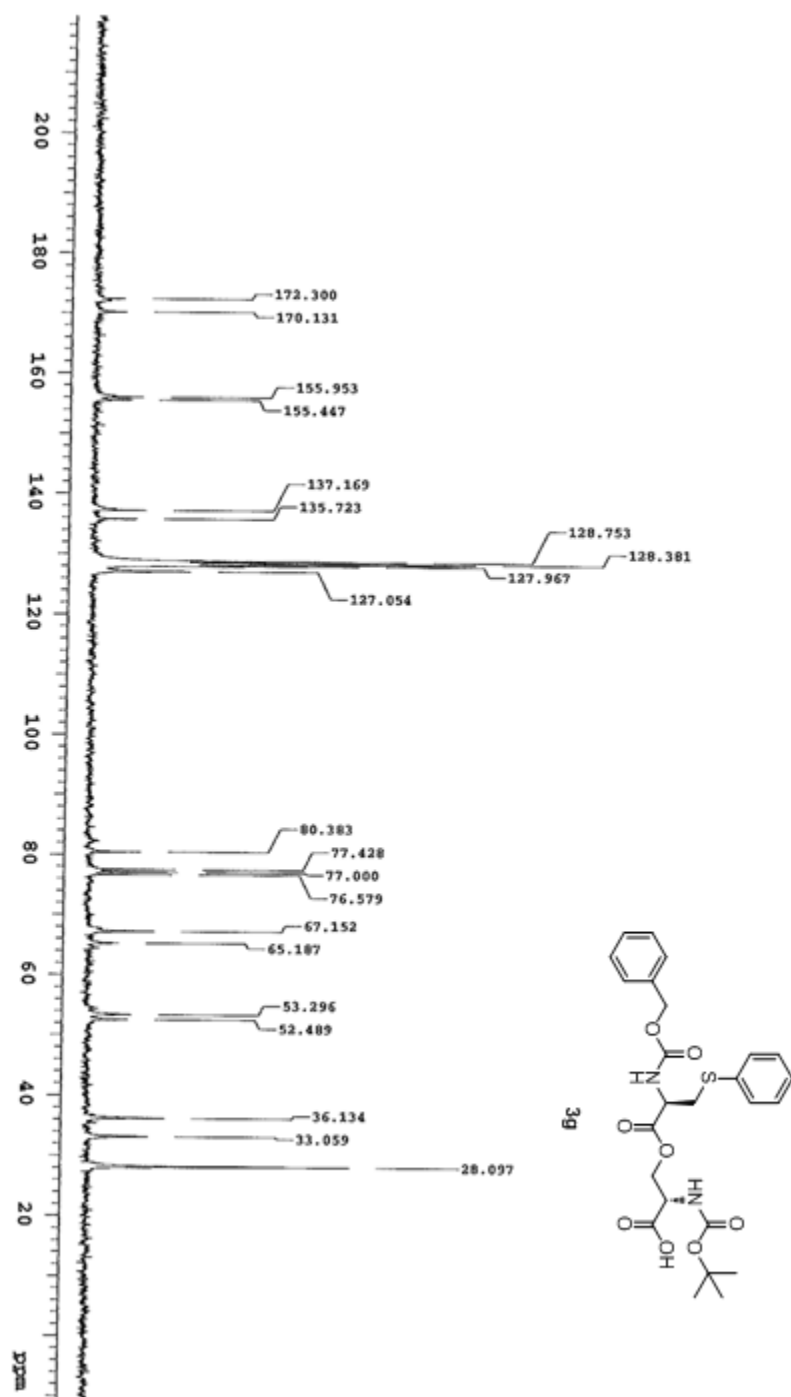

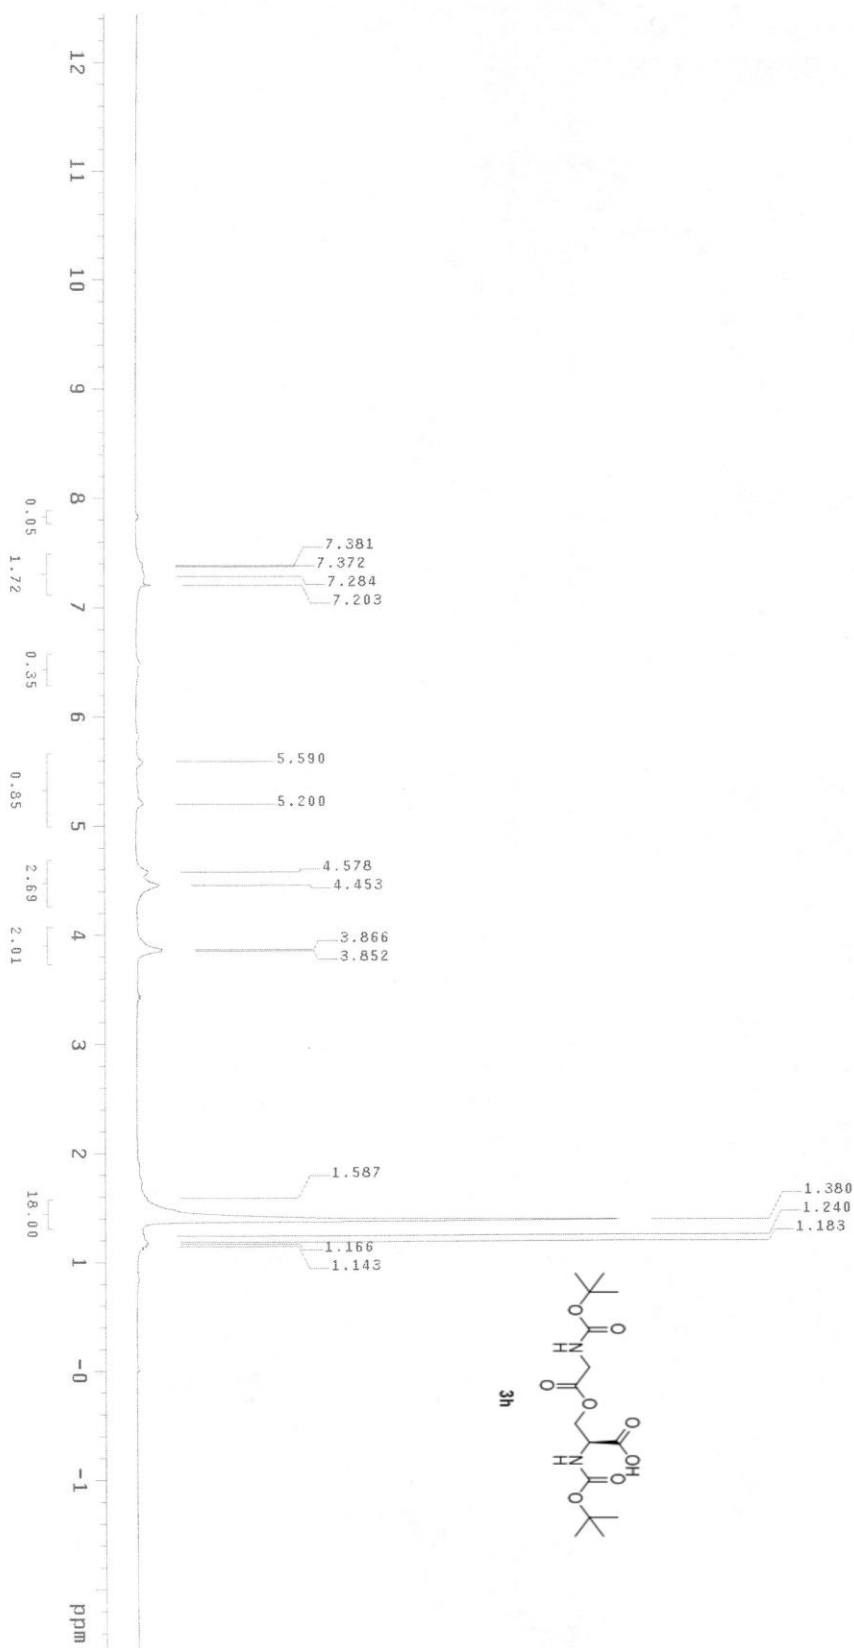

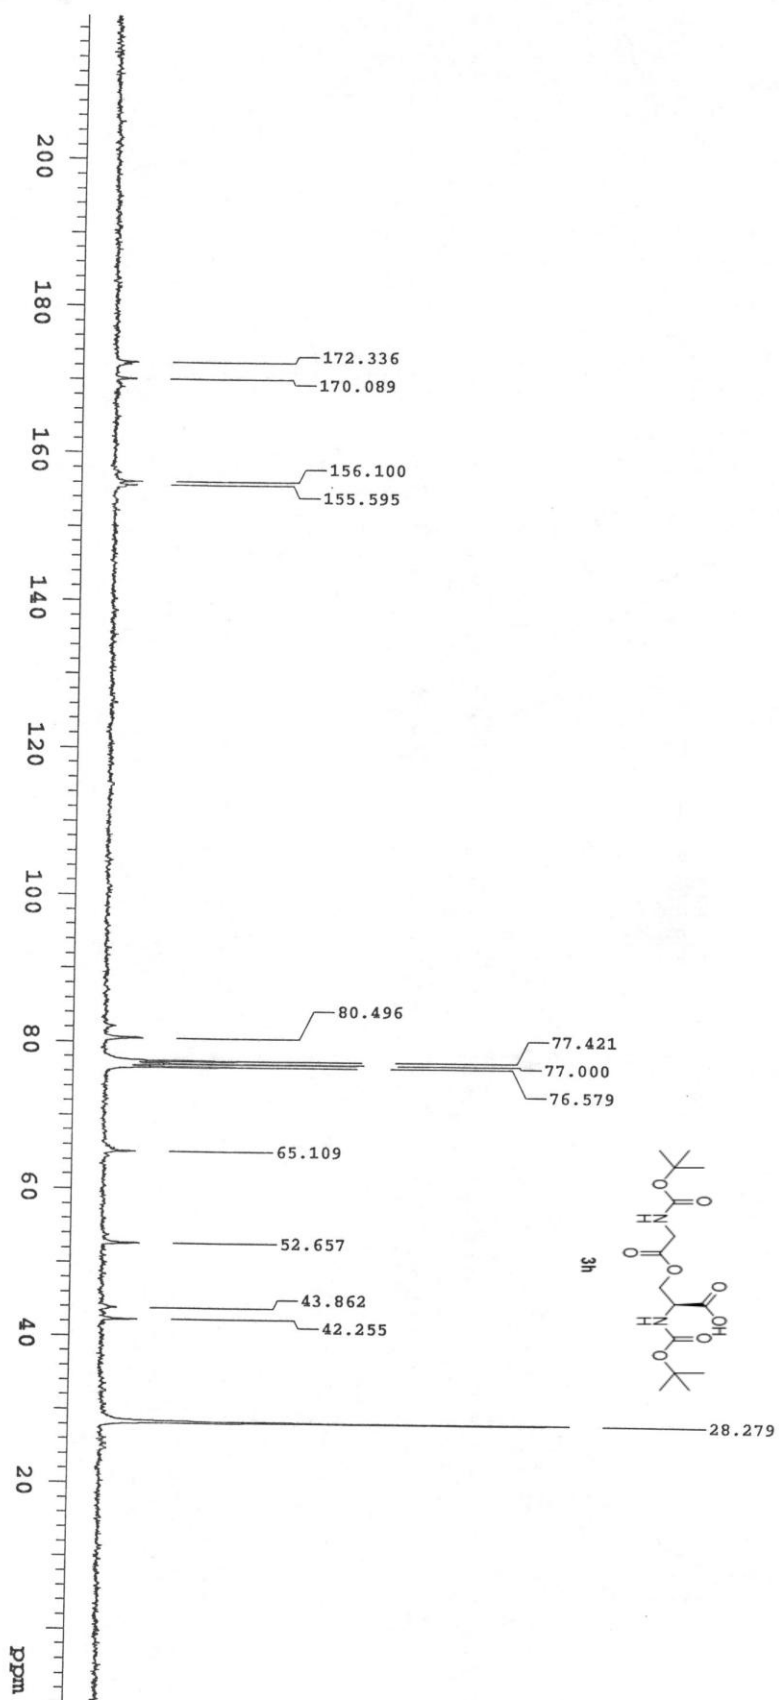

### 3. $^1\text{H}$ NMR and $^{13}\text{C}$ NMR spectra for compounds **4a-h**

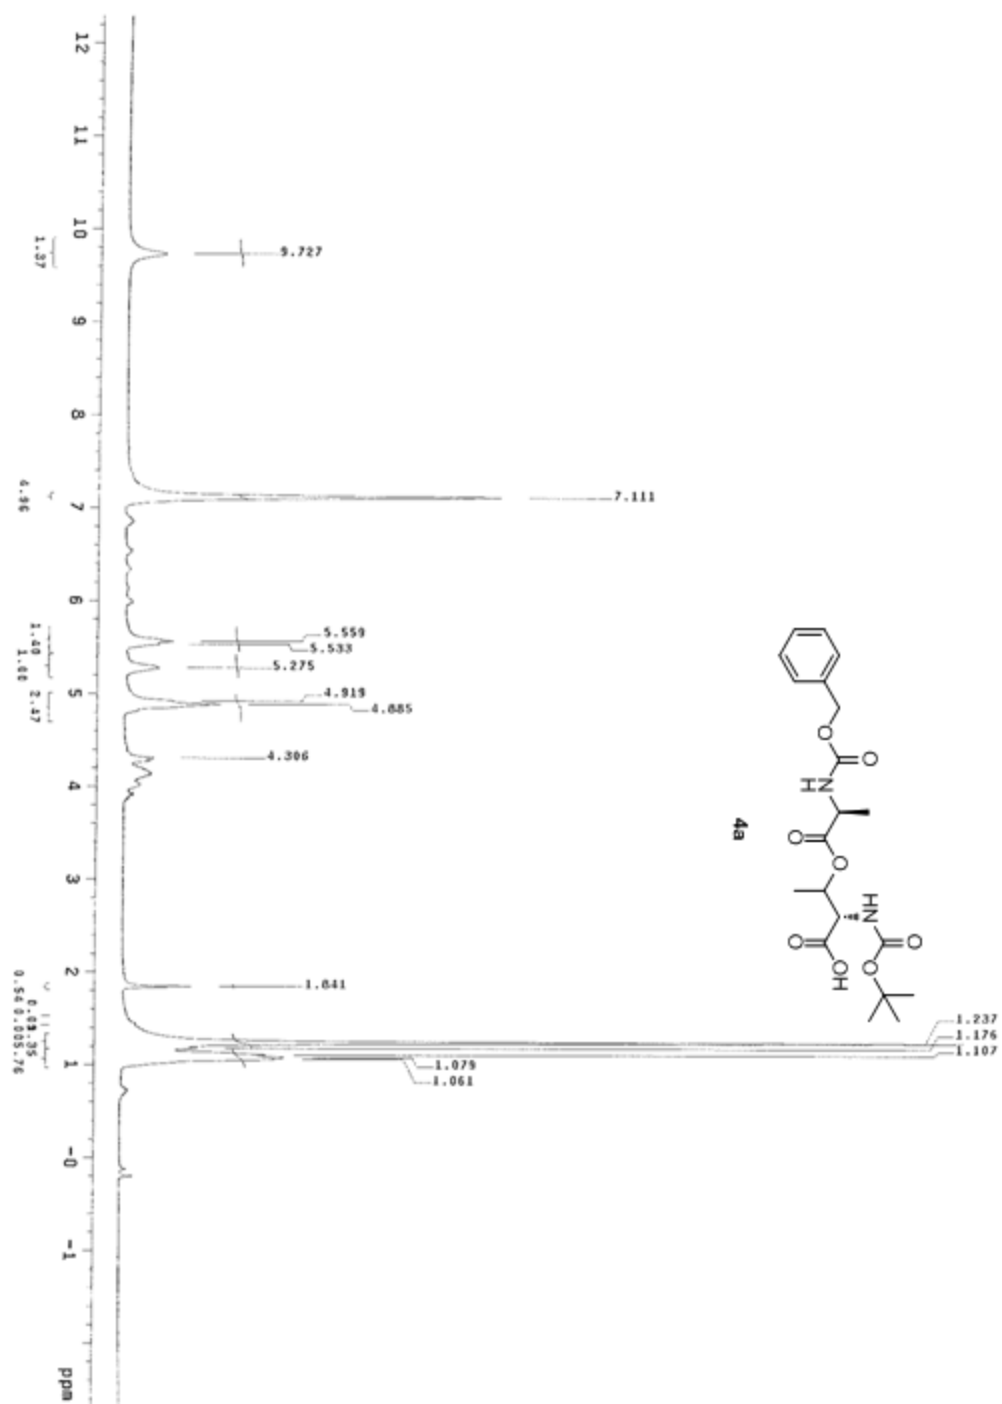

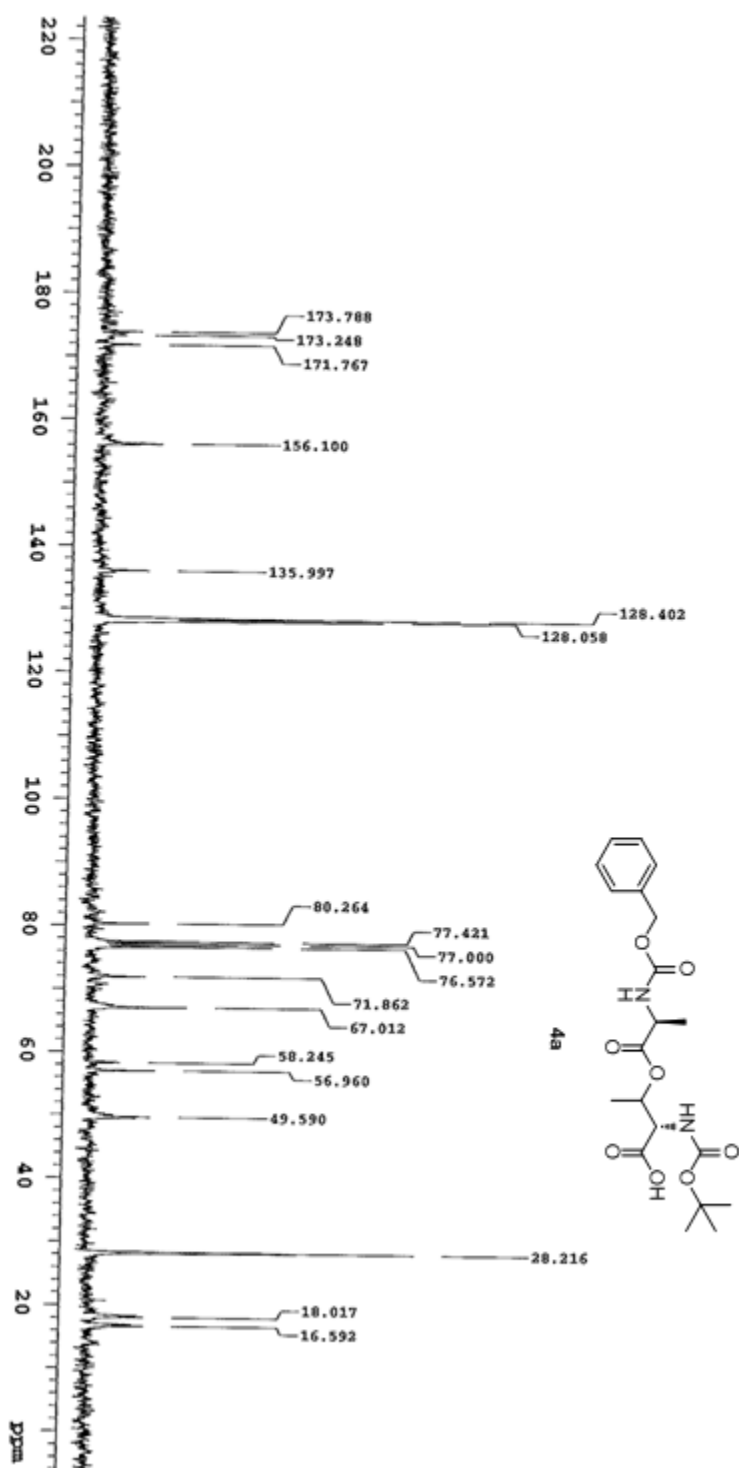

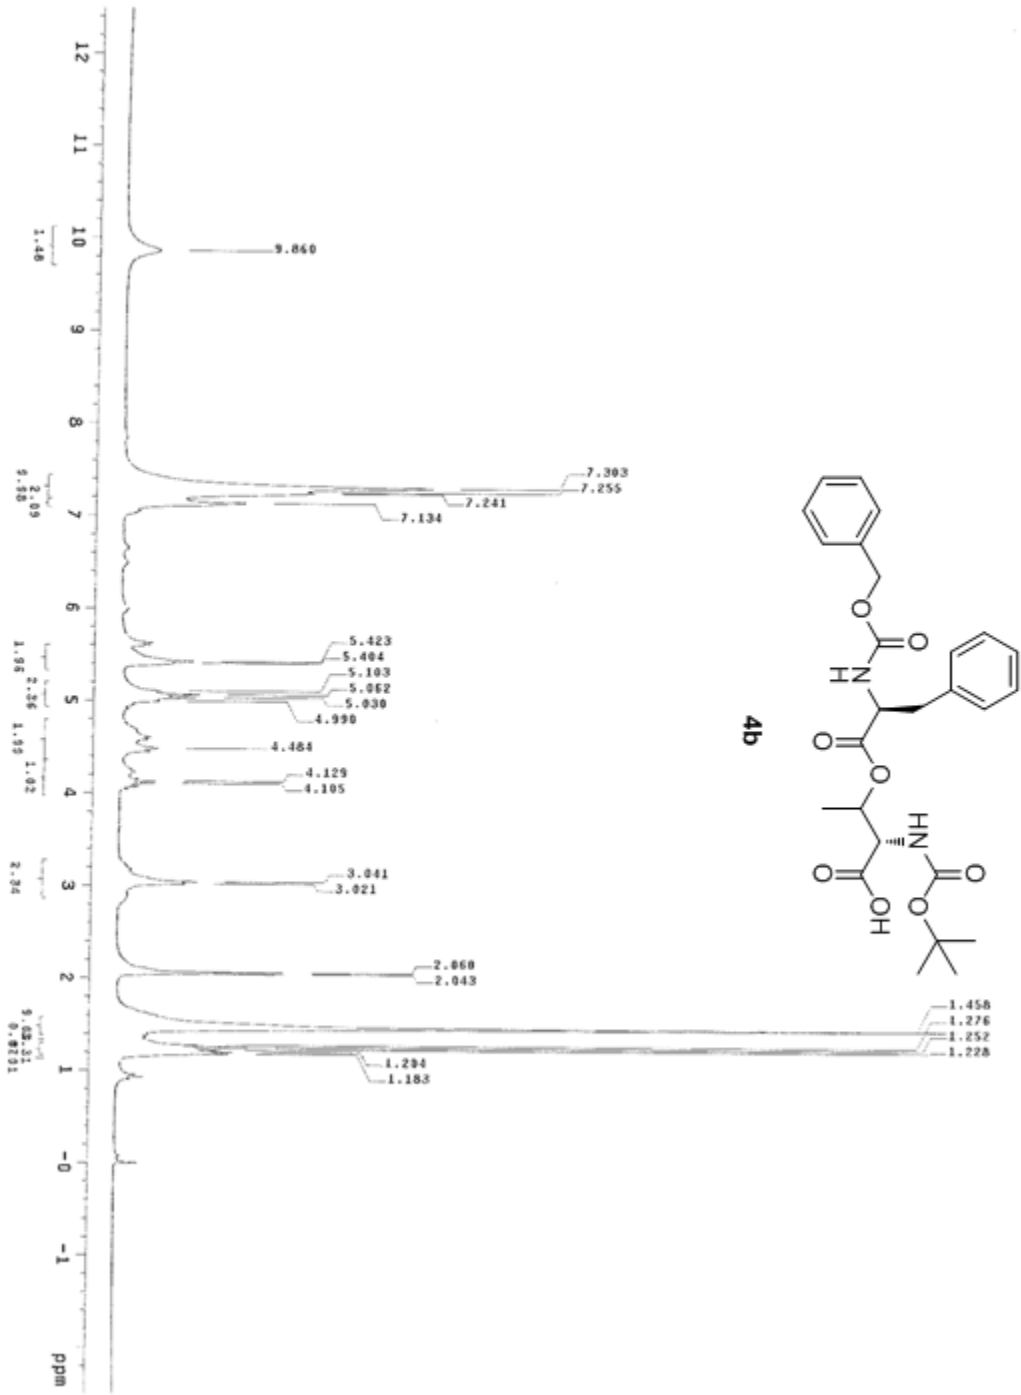

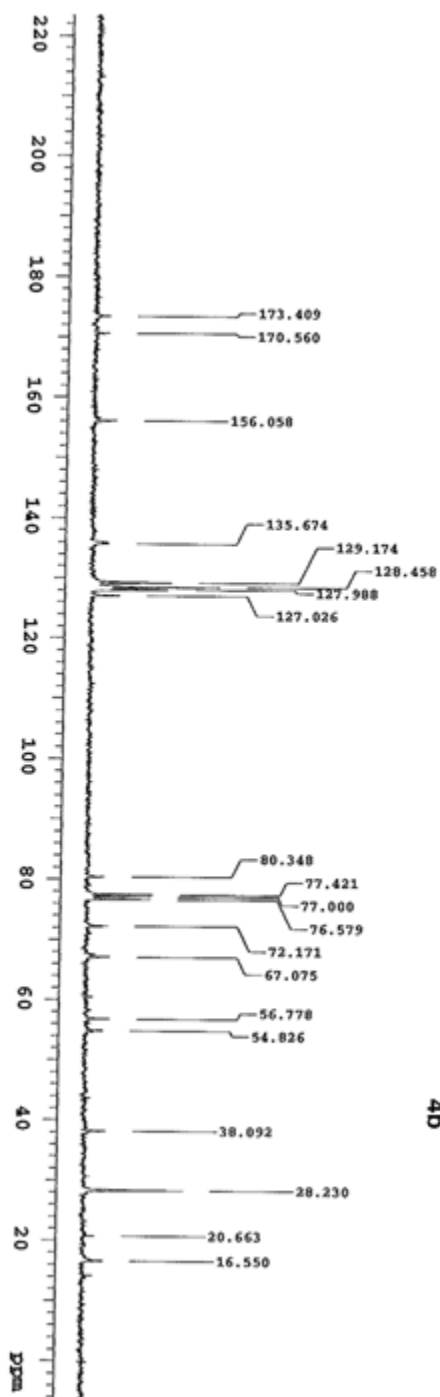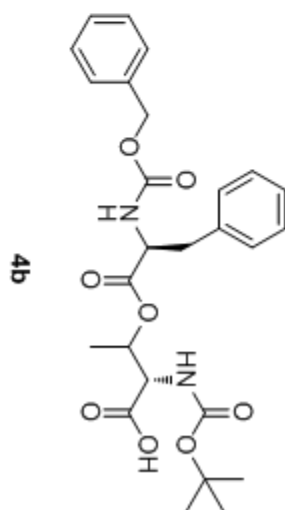



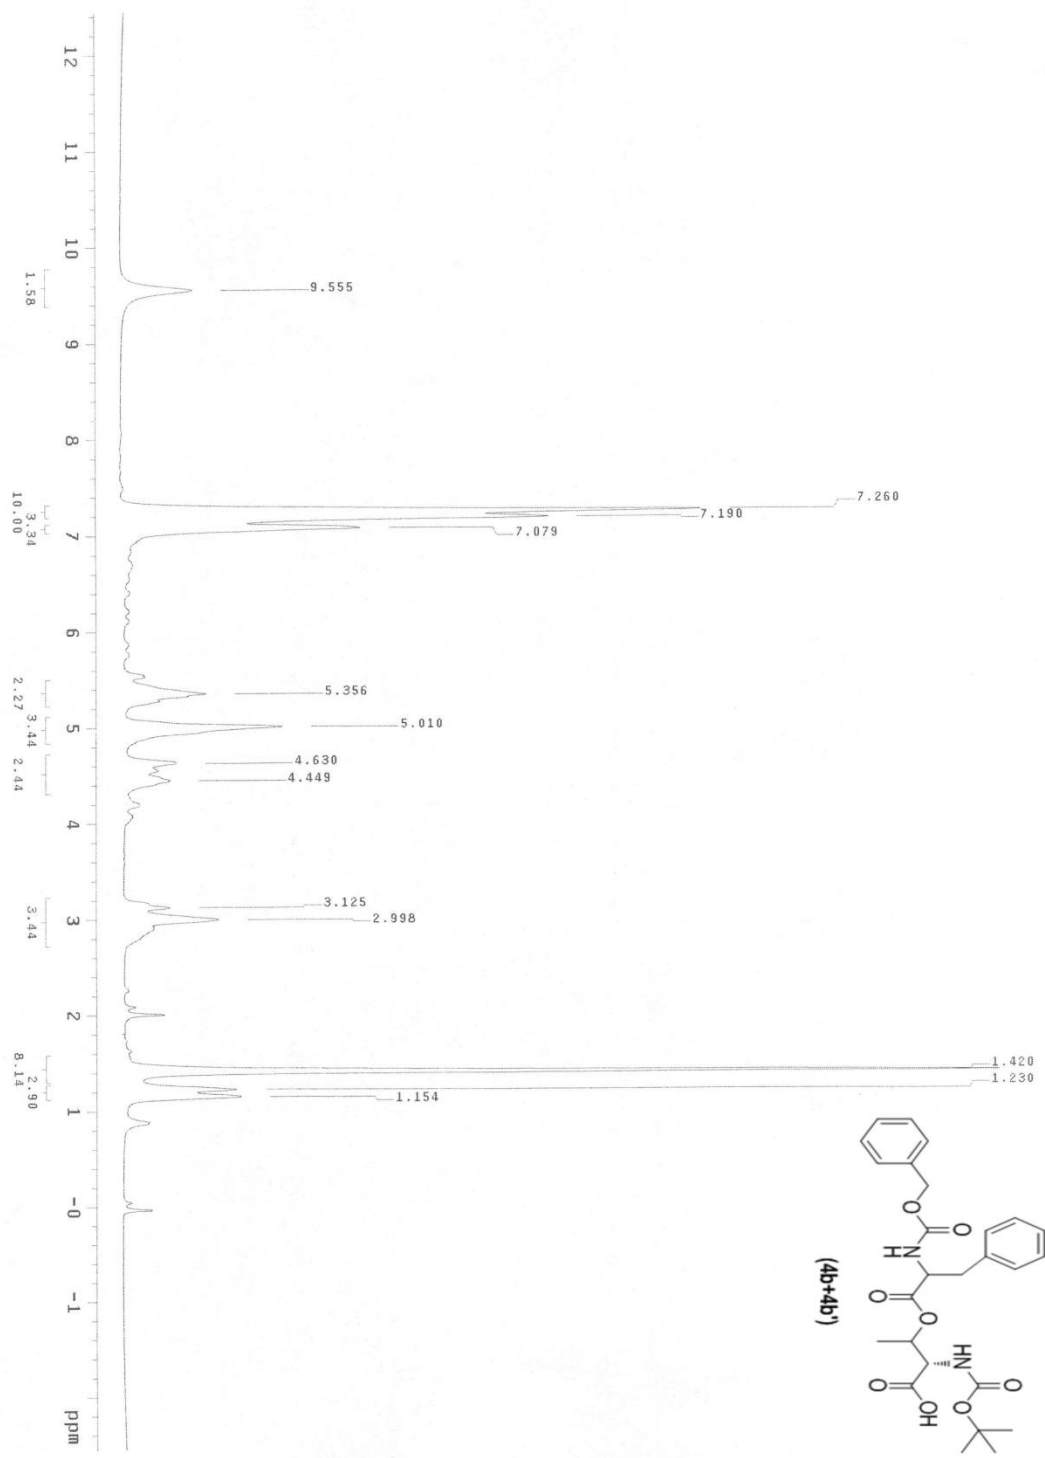

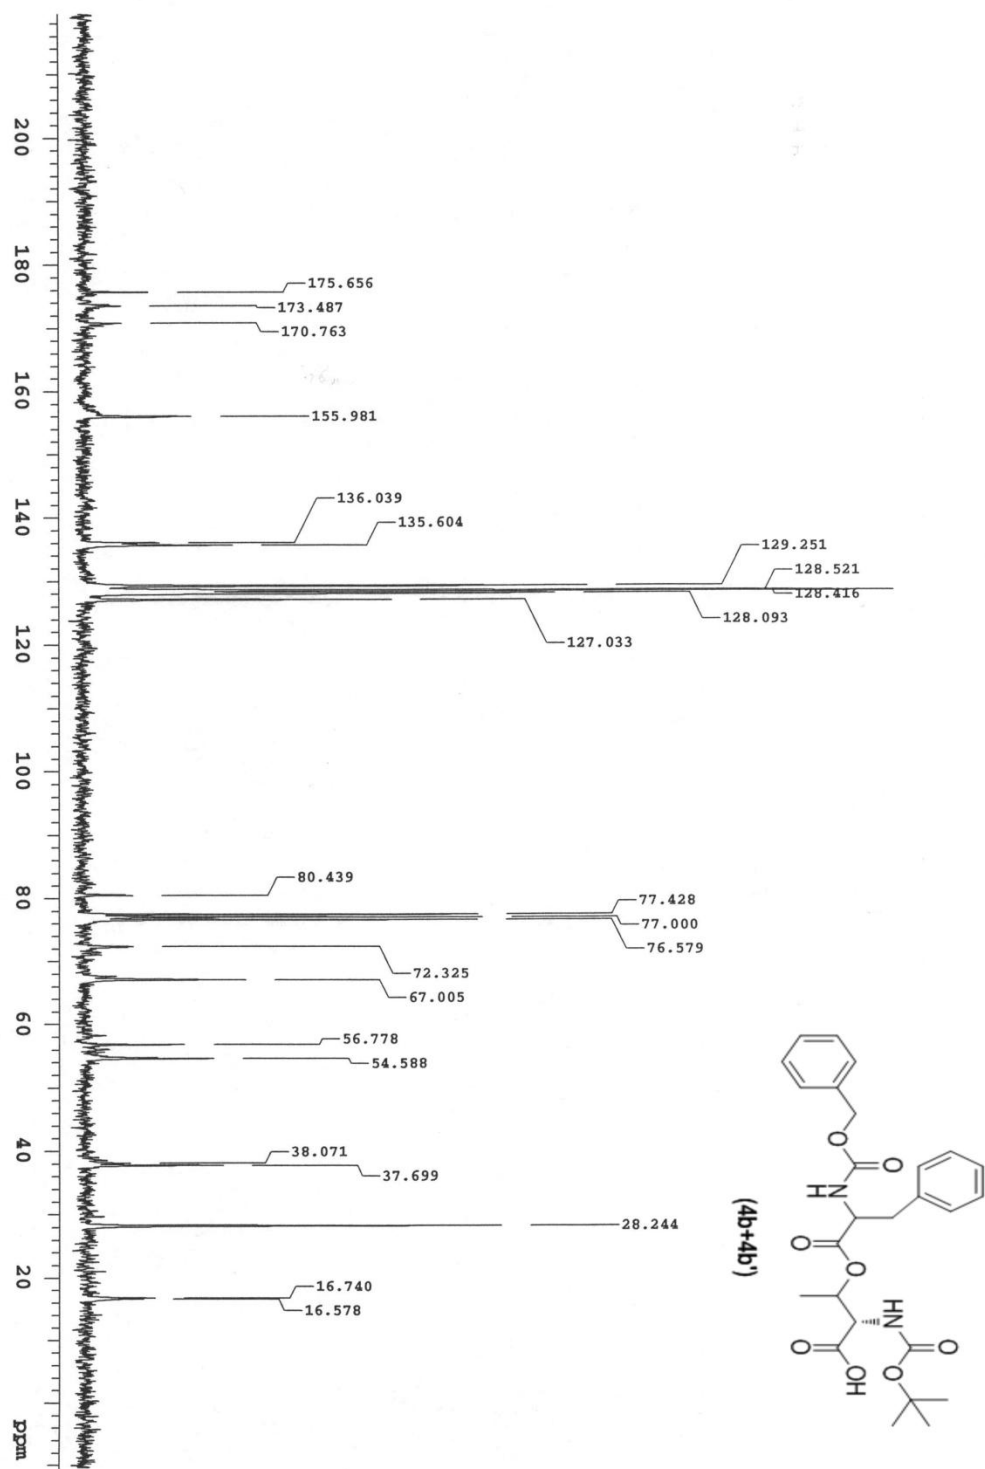

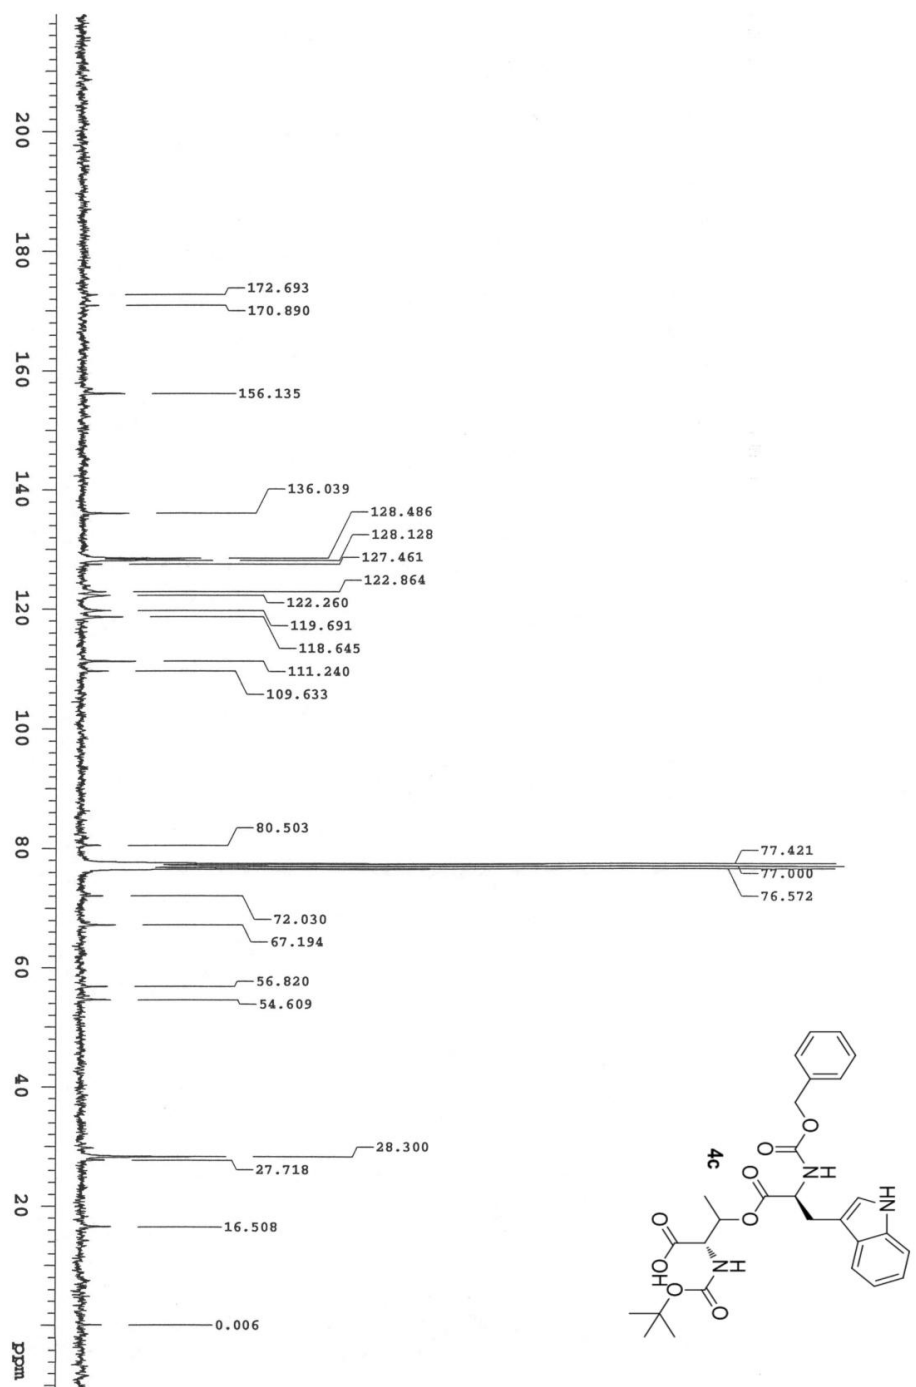

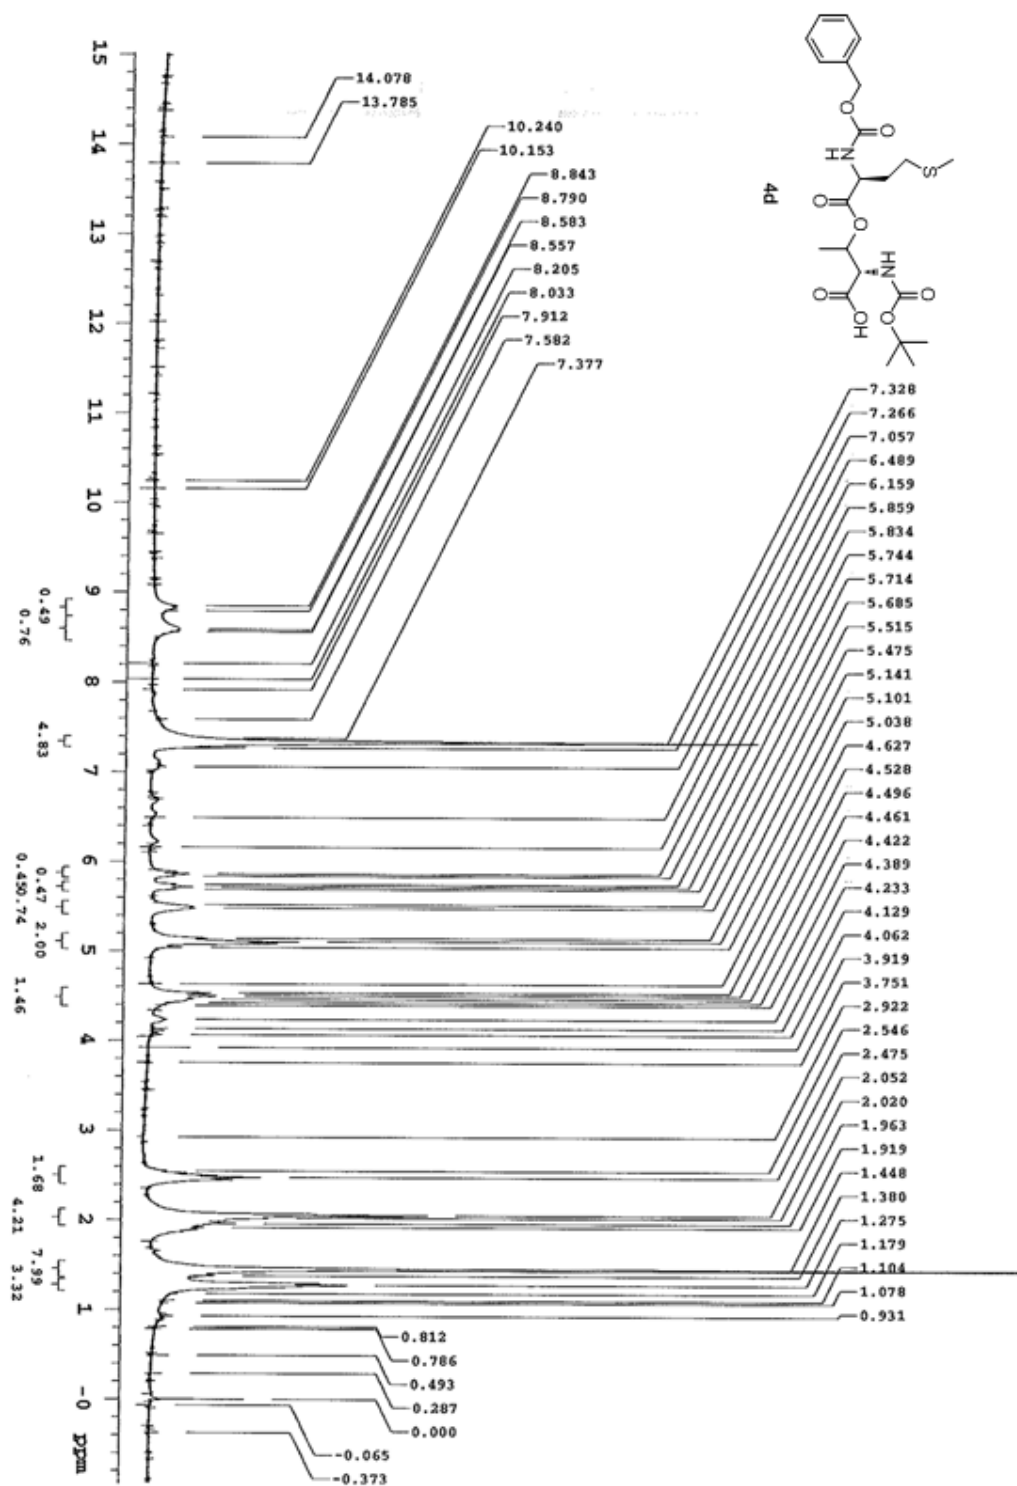

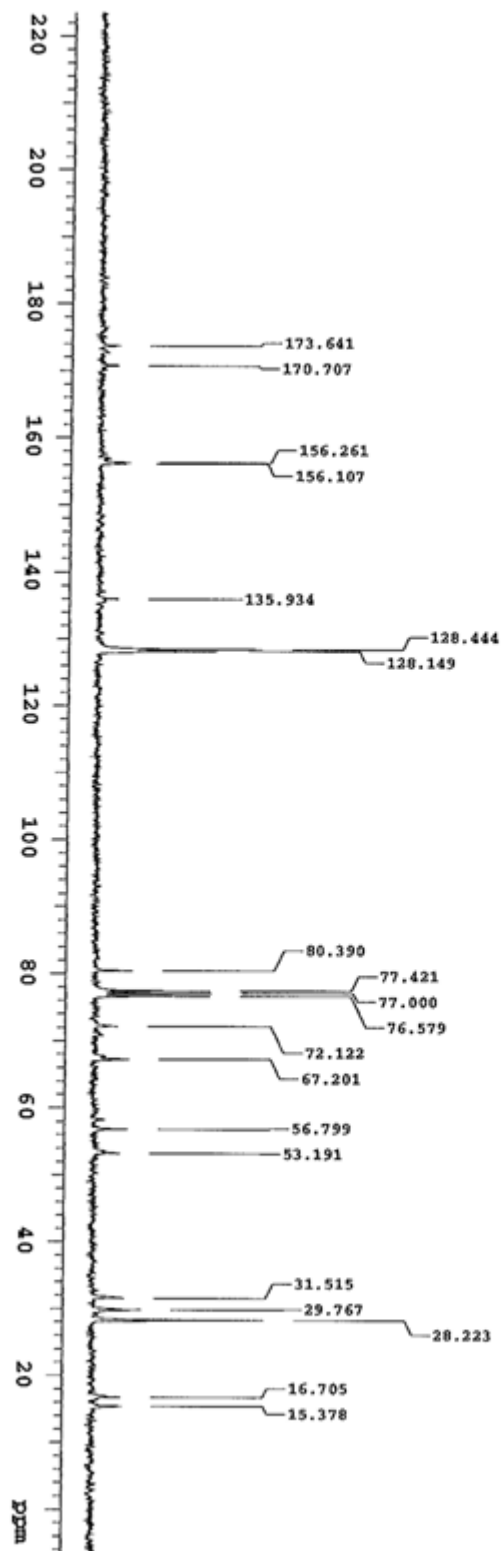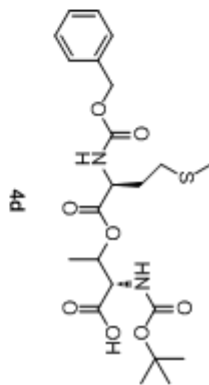

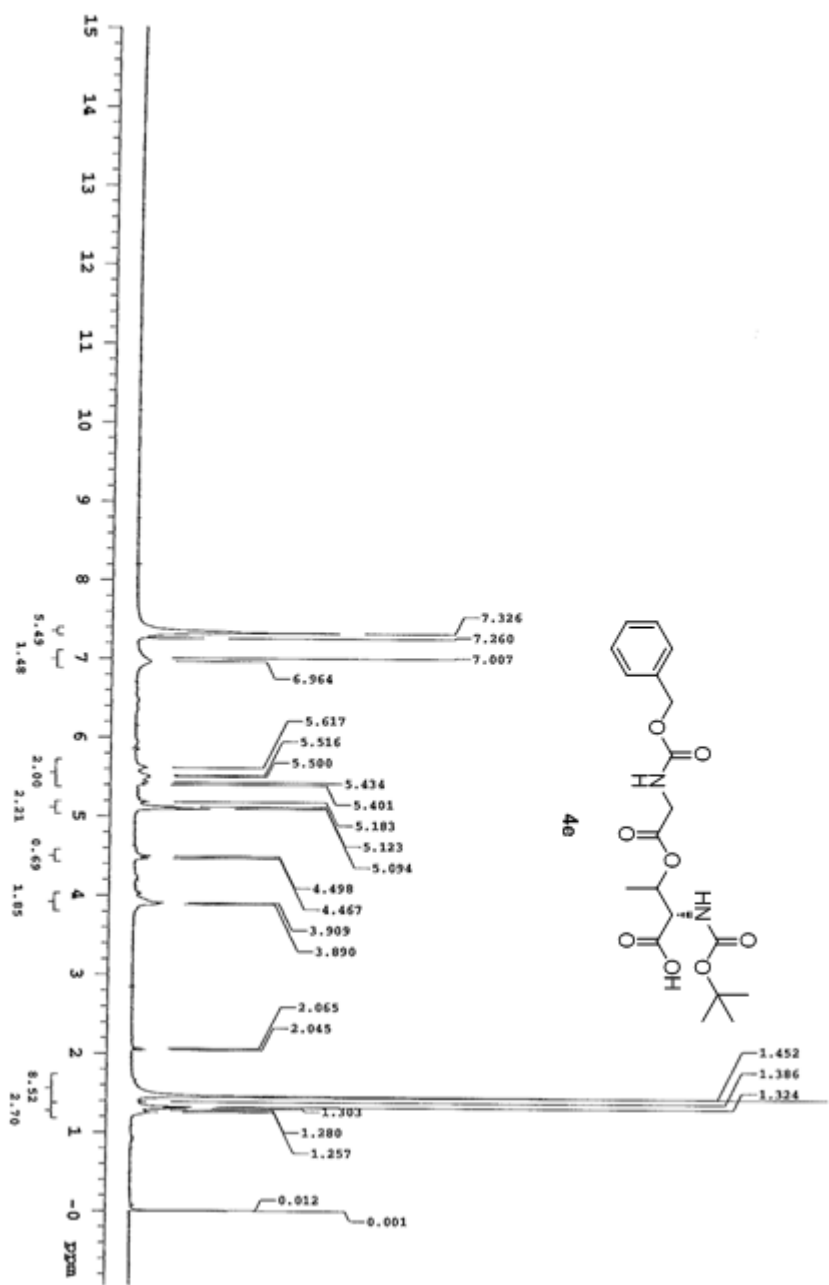

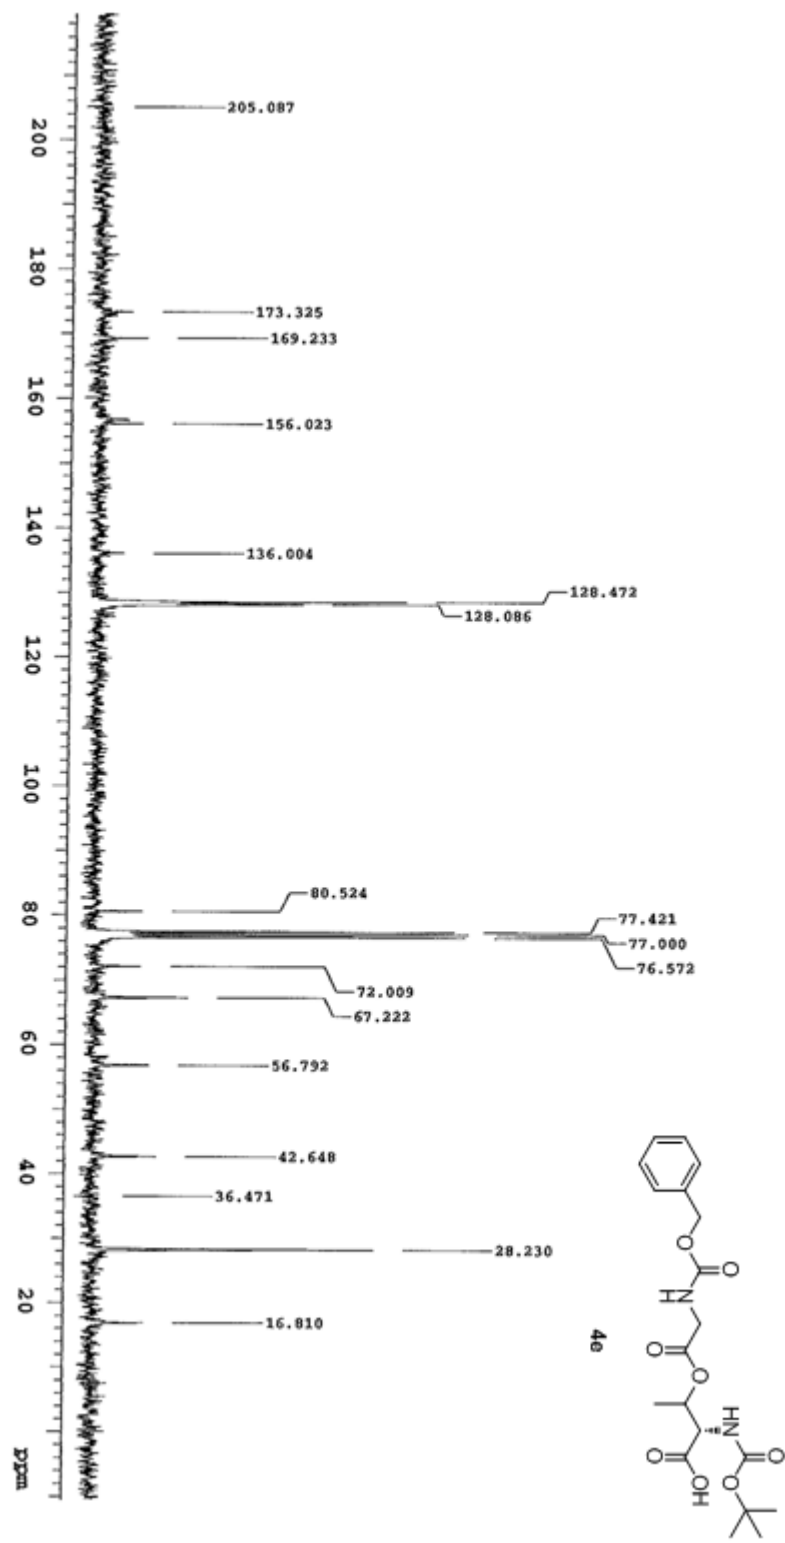

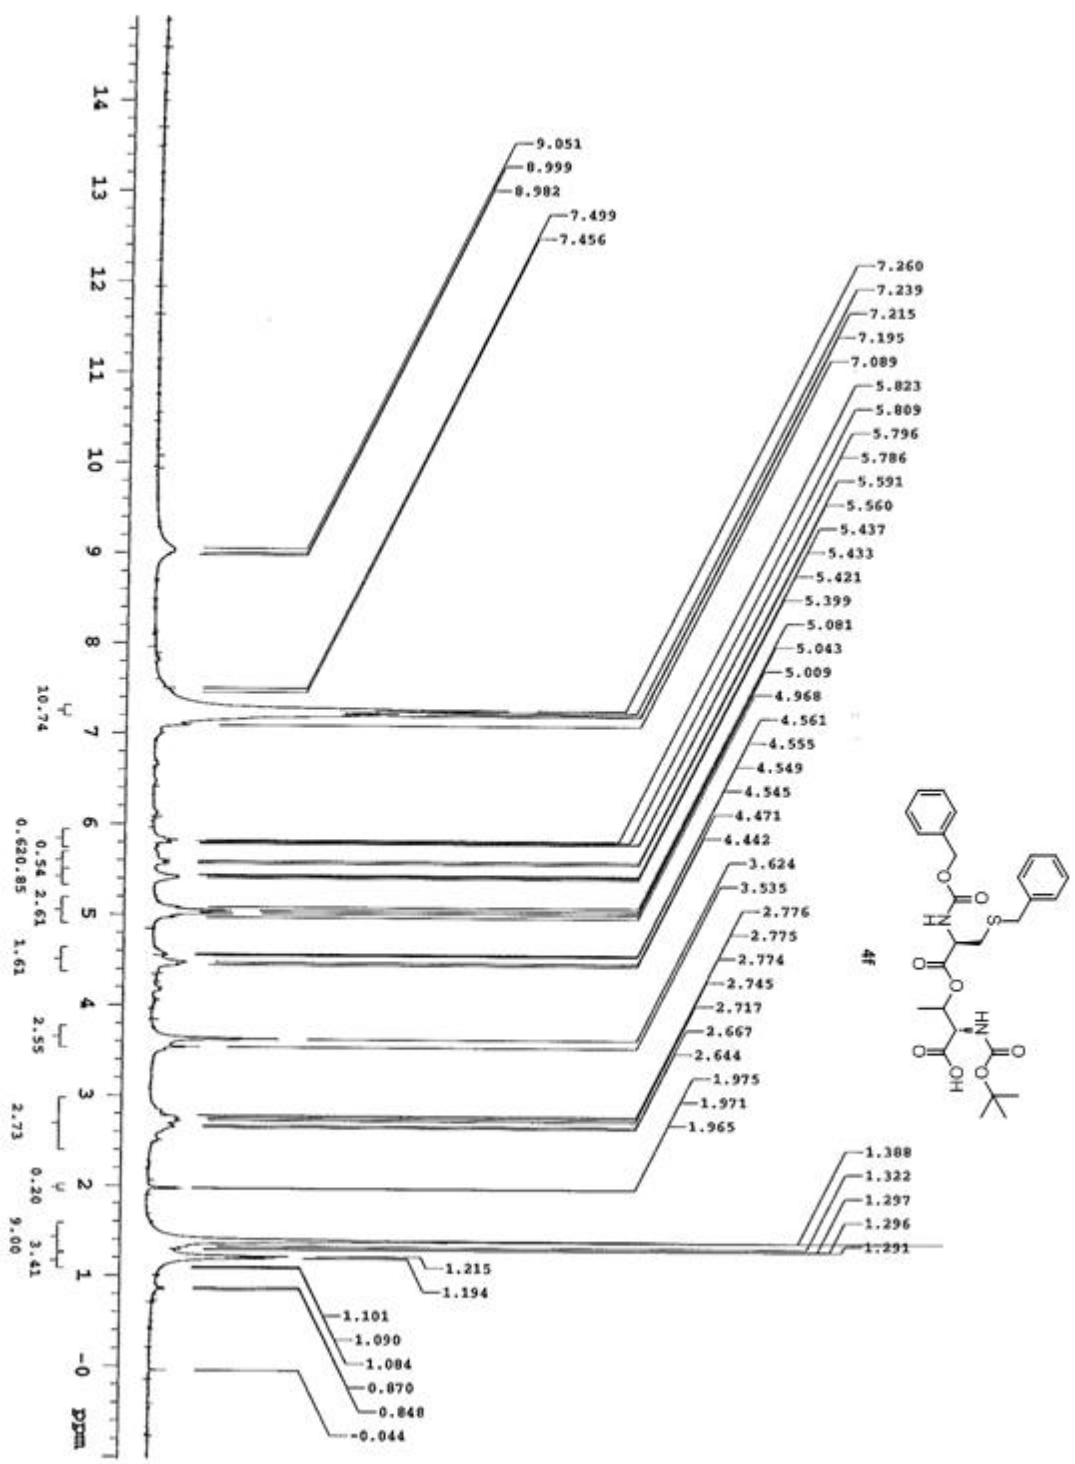



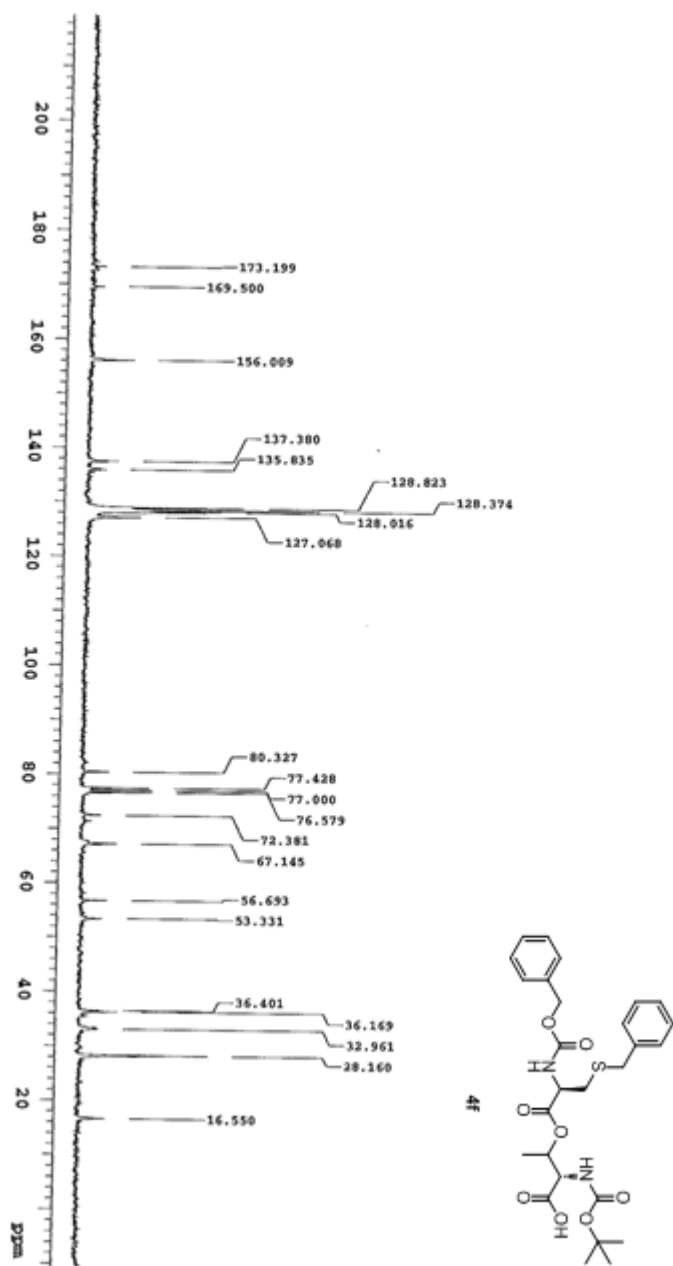

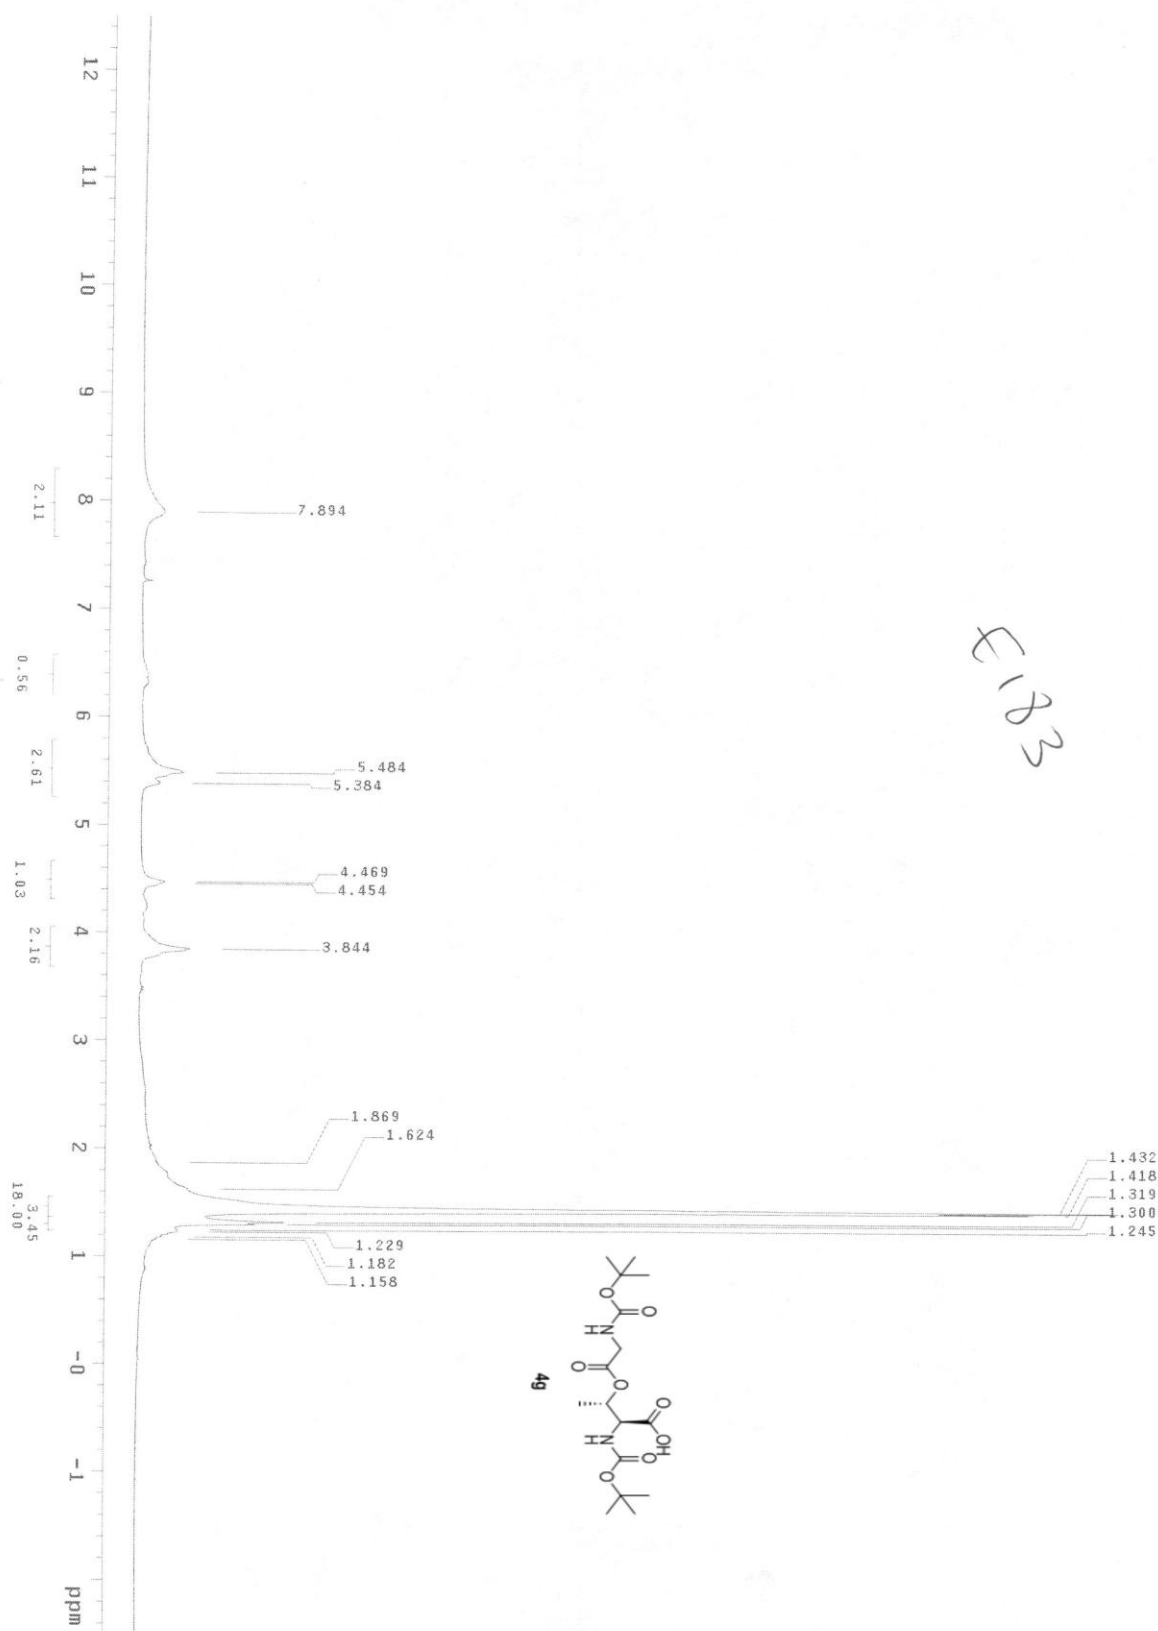

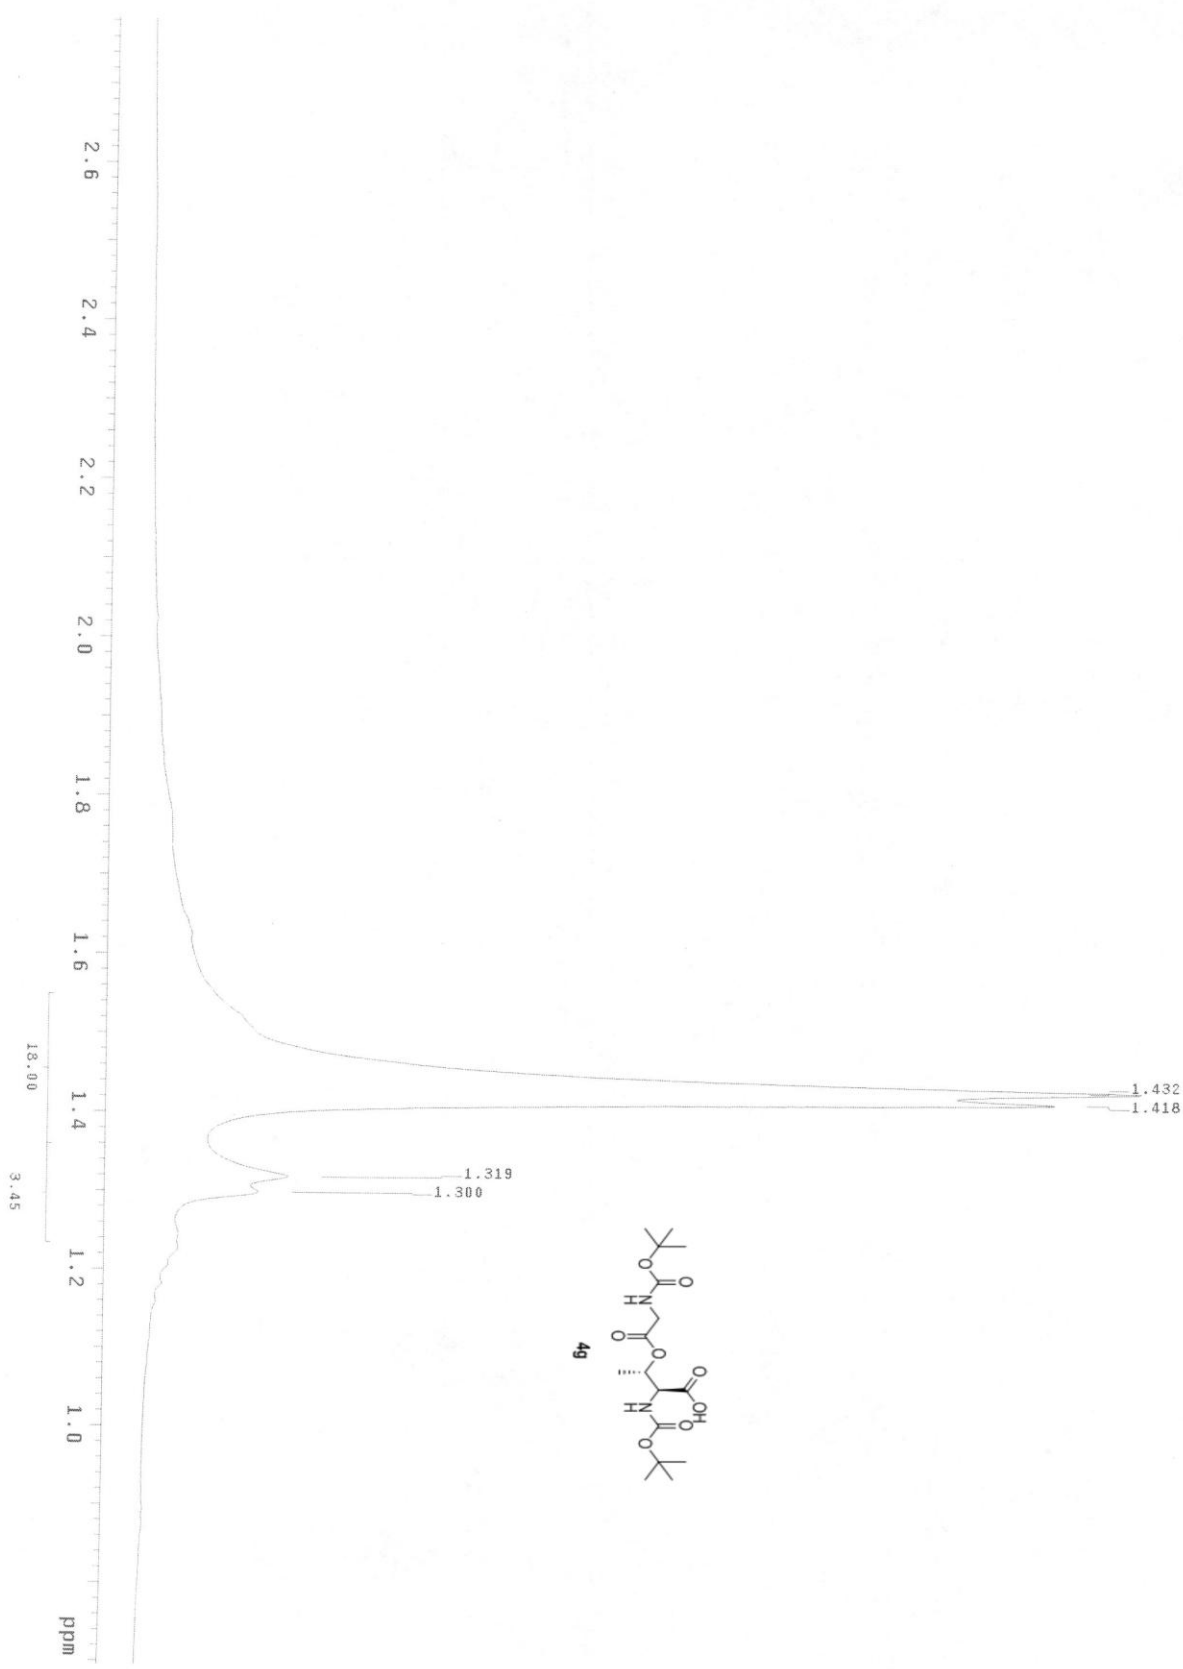

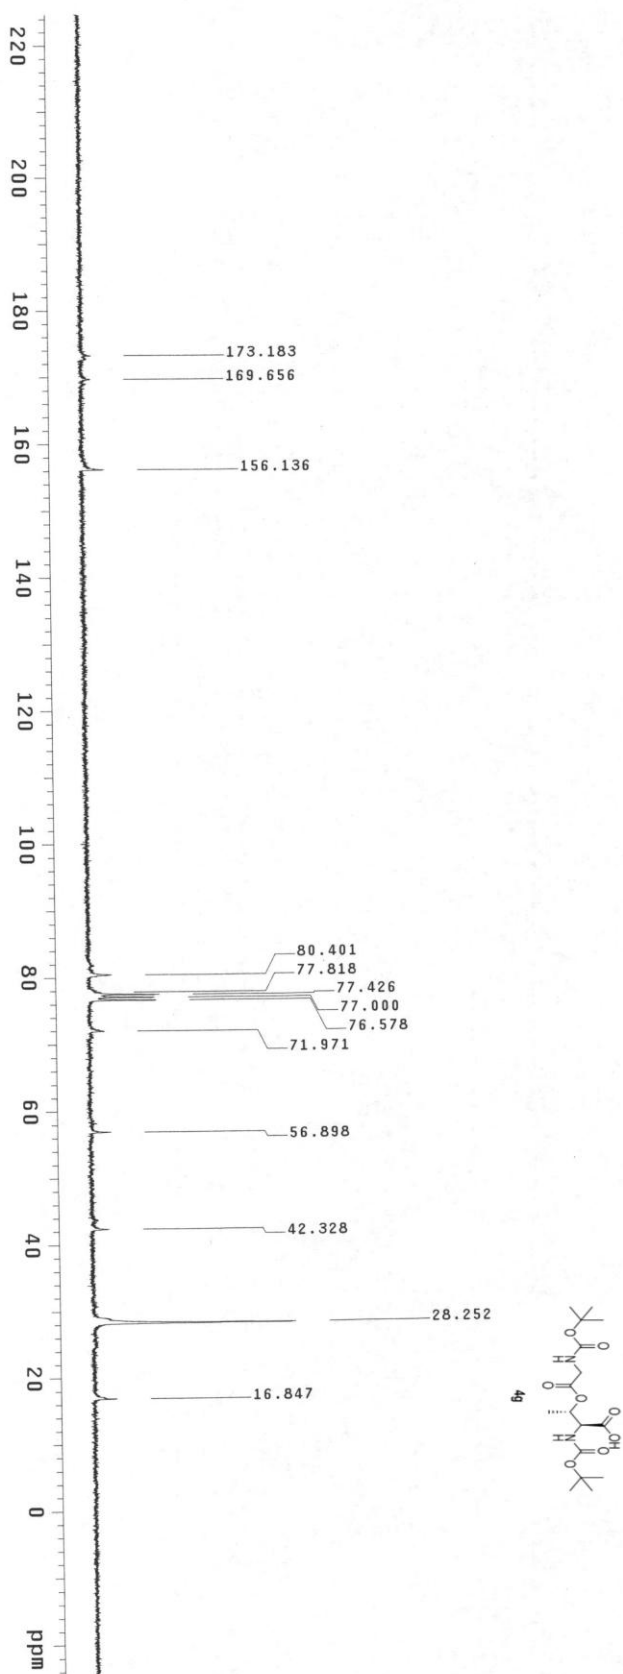

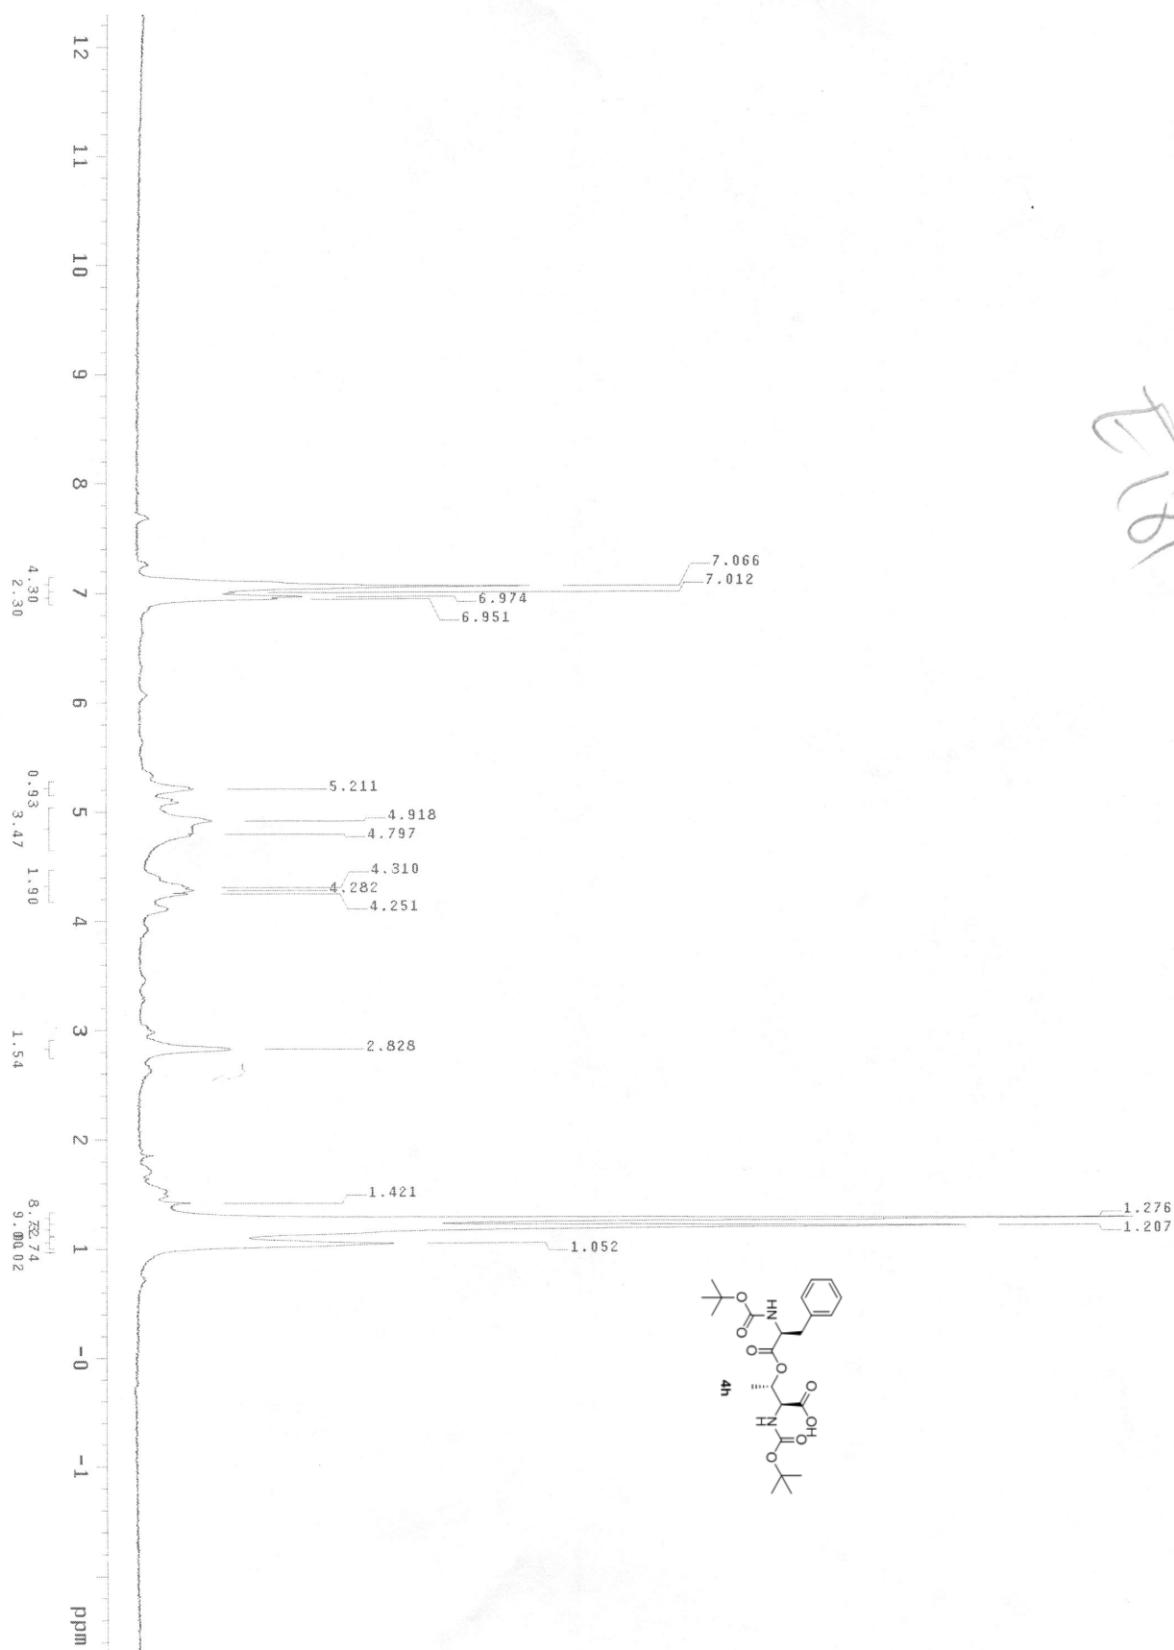

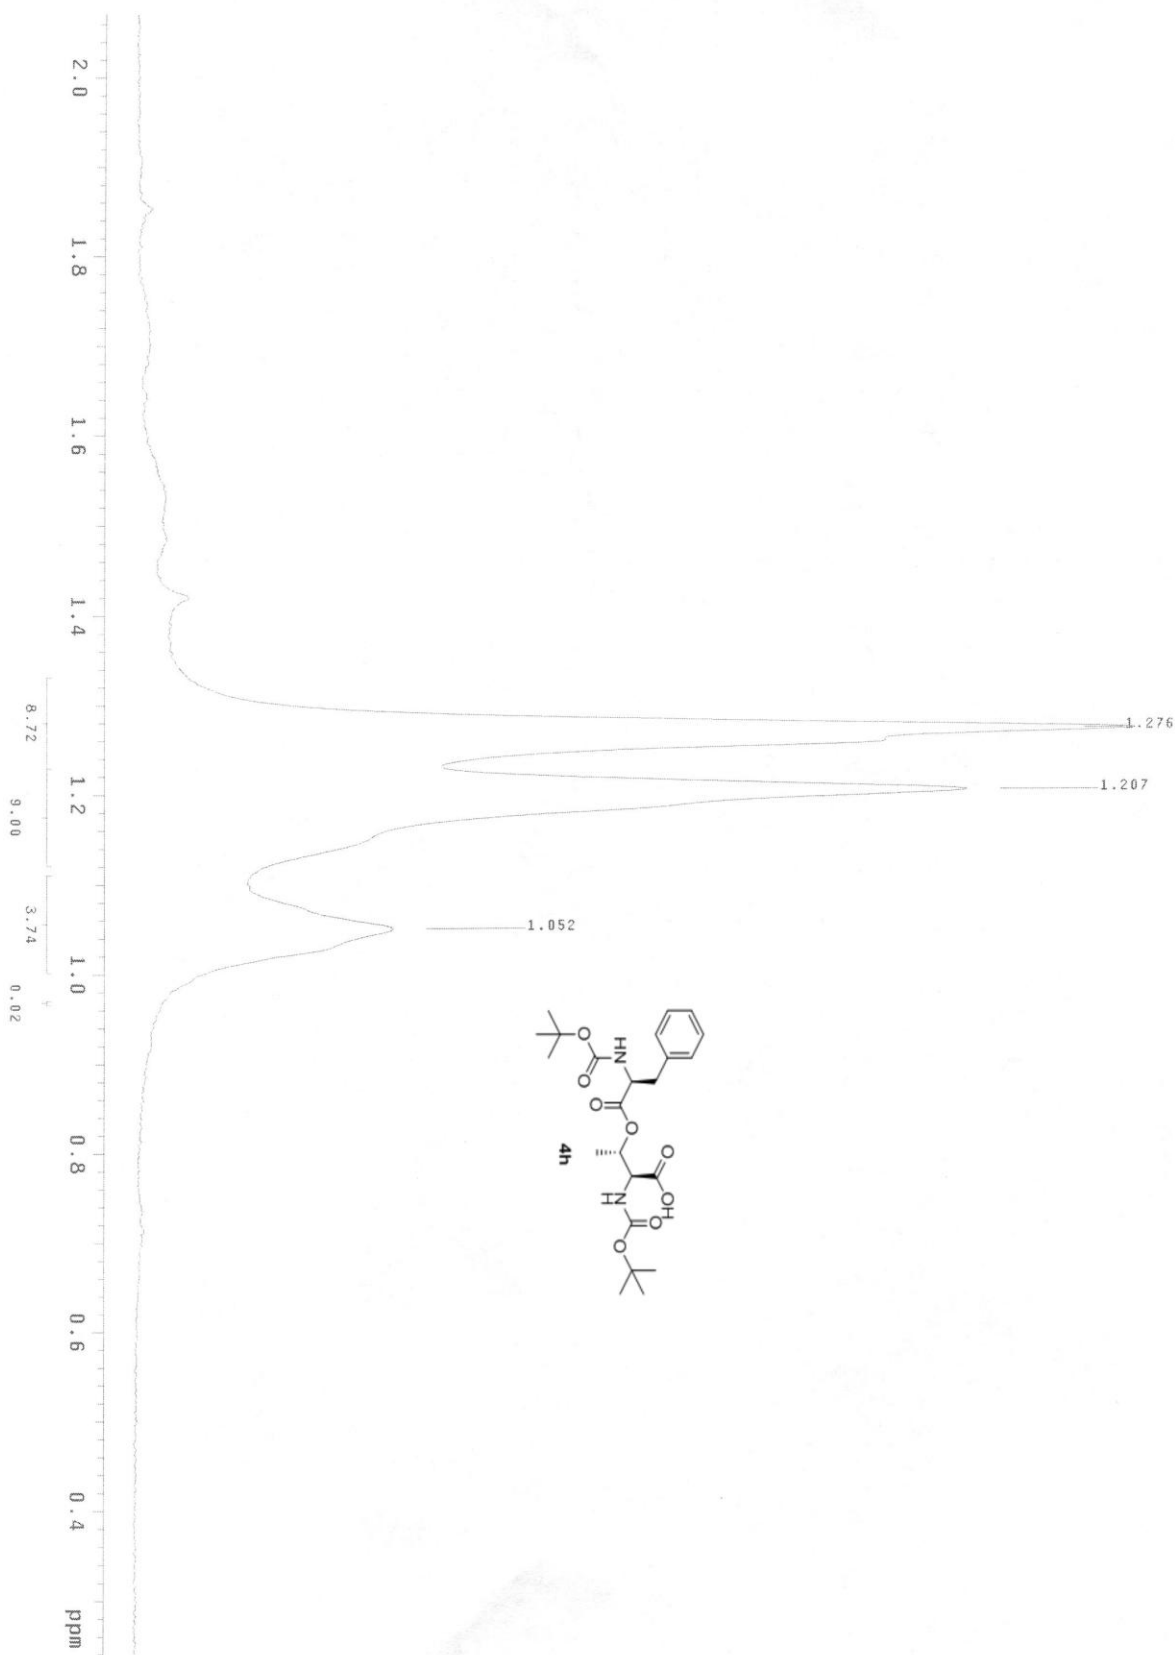

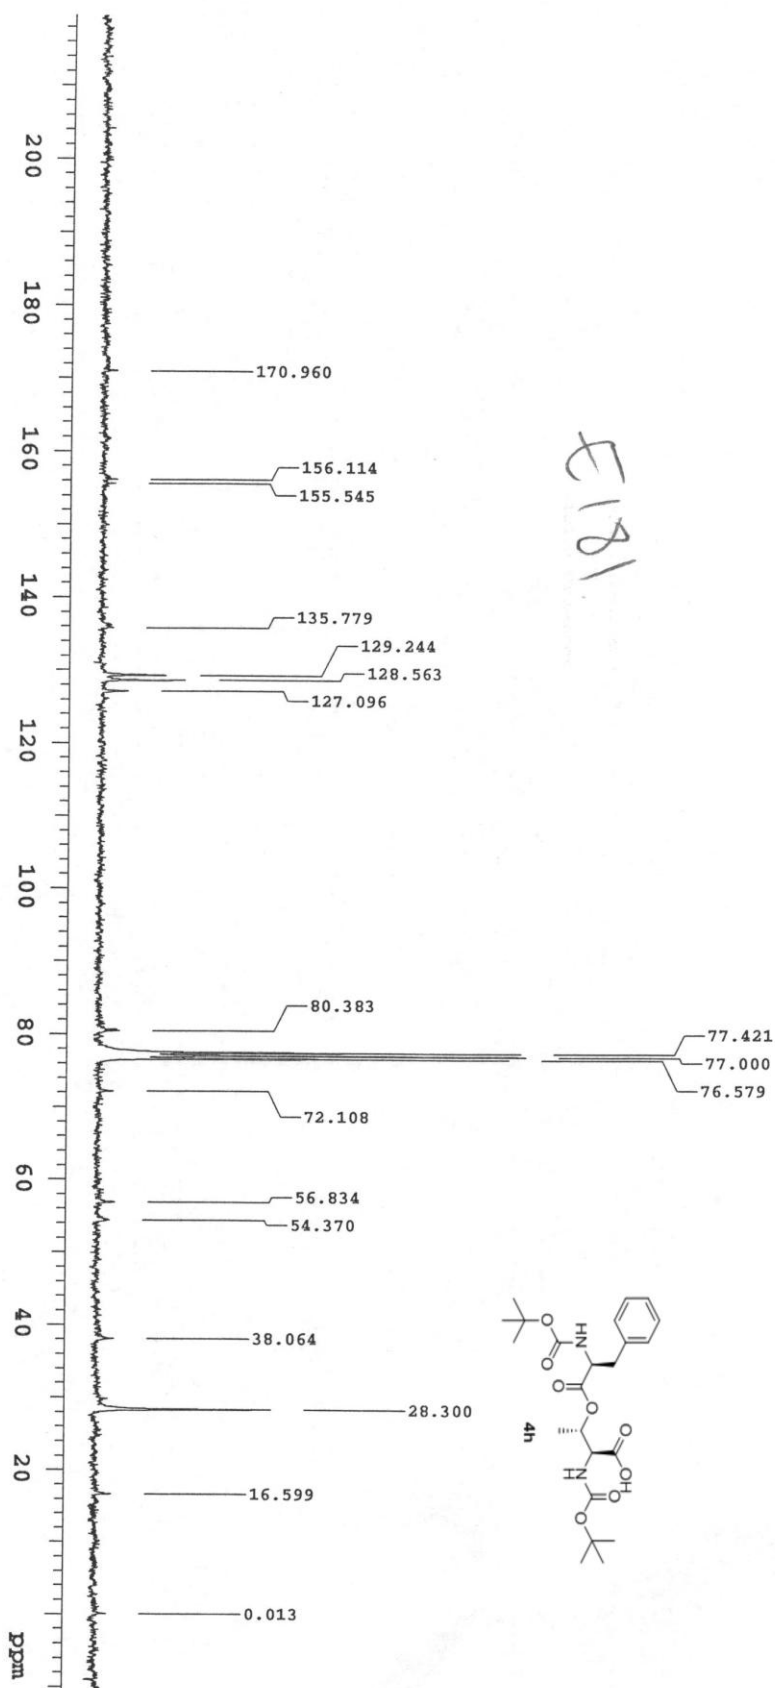

Supplement: c1md00130b.pdf [file c1md00130b.pdf]
